1 **GABA-Glutamate supramammillary neurons control theta and gamma**  
2 **oscillations in the dentate gyrus during paradoxical (REM) sleep**

3 **Abbreviated title:** SuML-dDG increases  $\theta$  and  $\gamma$  powers during REM

4  
5 Francesca Billwiller<sup>1\*</sup>, Laura Castillo<sup>2\*</sup>, Heba Elseedy<sup>24\*</sup>, Anton Ivanovich Ivanov<sup>2</sup>,  
6 Jennyfer Scapula<sup>2</sup>, Antoine Ghestem<sup>2</sup>, Julien Carponcy<sup>1</sup>, Paul Antoine Libourel<sup>1</sup>, H el ene  
7 Bras<sup>3</sup>, Nabila ElSayed Abdelmeguid<sup>4</sup>, Esther Krook-Magnuson<sup>5</sup>, Ivan  
8 Soltesz<sup>6</sup>, Christophe Bernard<sup>2</sup>, Pierre-Herv e Luppi<sup>1\$</sup>, Monique Esclapez<sup>2\$@</sup>  
9 \* equal contributing first authors; \$ equal contributing senior authors

10

11 <sup>1</sup>UMR 5292 CNRS/U1028 INSERM, Centre de Recherche en Neurosciences de Lyon  
12 (CRNL), Universit e Claude Bernard Lyon I, LYON Cedex 08, France

13 <sup>2</sup>Aix Marseille Univ, INSERM, INS, Institut de Neurosciences de Syst emes, Marseille,  
14 France

15 <sup>3</sup> Aix Marseille Univ, CNRS, INT, Institut de Neurosciences Timone, Marseille, France

16 <sup>4</sup> Zoology Department, Faculty of Science, Alexandria University, Alexandria, Egypt

17 <sup>5</sup>Department of Neuroscience, University of Minnesota, Minneapolis, MN 55455, USA

18 <sup>6</sup>Department of Neurosurgery, Stanford University, USA

19

20 **Corresponding author:** Dr. Monique Esclapez

21 Institut de Neurosciences des Syst emes - INS

22 UMR 1106 INSERM - Aix-Marseille Universit e,

23 Facult e de M edecine Timone,

24 27 Boulevard Jean Moulin

25 13385 Marseille Cedex 05, France

26 @ monique.esclapez@univ-amu.fr

27

28 Number of pages: 54

29 Number of figures: 8

30 Number of words for:

31 Abstract: 249

32 Significant statement: 116

33 Introduction: 633

34 Discussion: 1449

35

36 **Acknowledgements**

37 This work was supported by INSERM and Aix-Marseille University (M. E., H. E., C. B., L.  
38 C., Al. I., A. G., J. S.); Partenariats Hubert Curien (PHC) IMHOTEP (M.E., H.E., NE. A.);  
39 Agence Universitaire Francophone (H.E); CNRS, Fondation pour la recherche m edecale  
40 (FRM), Soci et e Francaise de Recherche et M edecine du Sommeil (SFRMS), University  
41 Claude Bernard of Lyon (F.B., P-H. L., P-A. L., S. A.) and NS104590 (I. S., E. K-M).

42 We thank the animal facility (CEFOS, AMU, Marseille), the imaging facility (INPHIM,  
43 AMU, Marseille) and the electron microscope facility (IBDM, Marseille).

44

## 44 **Abstract**

45 Several studies suggest that neurons from the lateral region of the SuM (SuML)  
46 innervating the dorsal dentate gyrus (DG) display a dual GABAergic and glutamatergic  
47 transmission and are specifically activated during paradoxical (REM) sleep (PS). The  
48 objective of the present study is to fully characterize the anatomical, neurochemical and  
49 electrophysiological properties of the SuML-DG projection neurons and to determine  
50 how they control DG oscillations and neuronal activation during PS and other vigilance  
51 states. For this purpose, we combine structural connectivity techniques using  
52 neurotropic viral vectors (rabies virus, AAV), neurochemical anatomy  
53 (immunohistochemistry, in situ hybridization) and imaging (light, electron and confocal  
54 microscopy) with *in vitro* (patch clamp) and *in vivo* (LFP, EEG) optogenetic and  
55 electrophysiological recordings performed in transgenic VGLUT2-cre male mice. At the  
56 cellular level, we show that the SuML-DG neurons co-release GABA and glutamate on  
57 dentate granule cells and increase the activity of a subset of DG granule cells. At the  
58 network level, we show that activation of the SuML-DG pathway increases theta power  
59 and frequency during PS as well as gamma power during PS and waking in the DG. At  
60 the behavioral level, we show that the activation of this pathway does not change animal  
61 behavior during PS, induces awakening during slow wave sleep and increases motor  
62 activity during waking. These results suggest that the SuML-DG pathway is capable of  
63 supporting the increase of theta and gamma power in the DG observed during PS and  
64 plays an important modulatory role of DG network activity during this state.

65

65 **Significant statement**

66 An increase of theta and gamma power in the dentate gyrus (DG) is an hallmark of  
67 paradoxical (REM) sleep (PS) and is suggested to promote learning and memory  
68 consolidation by synchronizing hippocampal networks and increasing its outputs to  
69 cortical targets. However the neuronal networks involved in such control of DG activity  
70 during PS are poorly understood. The present study identifies a population of  
71 GABA/Glutamate neurons in the lateral supramammillary nucleus (SuML) innervating the  
72 DG that could support such control during PS. Indeed, we show that activation of these  
73 SuML-DG projections increase theta power and frequency as well as gamma power in  
74 the DG specifically during PS and modulate activity of a subset of DG granule cells.

75

## 75 **Introduction**

76 The supramammillary nucleus (SuM) is a thin structure overlying the mammillary bodies  
77 in the hypothalamus that provides substantial projections to many regions of the limbic  
78 system including the hippocampal formation (for review see Pan and McNaughton 2004,  
79 Vertes 2015). The SuM is composed of several populations of neurons that differ in their  
80 neurochemical content and the specificity of their connections (Swanson et al., 1982;  
81 Gonzalo-Ruiz et al., 1992; Leranth and Kiss, 1996; Kocsis et al., 2003; Borhegyi and  
82 Leranth, 1997; Haglund et al., 1984). In rats, many studies have described the  
83 projections from SuM neurons to the hippocampus (Segal & Landis, 1974; Pasquier &  
84 Reinoso-Suarez, 1976, 1978; Wyss et al., 1979; Haglund et al., 1984; Saper et al.,  
85 1985; Vertes, 1992; Magloczky et al., 1994; Nitsch and Leranth 1996; Vertes &  
86 McKenna, 2000). We (Soussi et al., 2010) and others (Boulland et al., 2009)  
87 demonstrated in rats that SuM neurons from the most medial part of the SuM (SuMM;  
88 Paxinos and Watson, 1998), referred as SuMm by Swanson (1998), or SuMp by Pan  
89 and McNaughton (2004) innervating the inner molecular layer of the ventral dentate  
90 gyrus (DG) and CA2 pyramidal cells are glutamatergic (Soussi et al., 2010). In contrast,  
91 SuM neurons located in the lateral two-third region of the SuM (SuML), referred as  
92 SuMg by Pan and McNaughton (2004), innervate the supragranular layer of the dorsal  
93 DG (dDG) and to a lesser extend the ventral DG (vDG) and display a unique dual  
94 glutamatergic and GABAergic neurotransmitter phenotype (Boulland et al., 2009; Soussi  
95 et al., 2010). Indeed, these SuML neurons and their projections to the dDG co-express  
96 markers for both glutamatergic (vesicular glutamate transporter 2; VGLUT2) and  
97 GABAergic (glutamate decarboxylase 65, GAD65 and vesicular GABA transporter,

98 VGAT) neurotransmission and establish asymmetric and symmetric synapses on DG  
99 cells (Soussi et al., 2010). The connectivity and neurochemical properties of these  
100 different SuM-hippocampal pathways suggest that they may contribute differently to  
101 hippocampal dependent functions. Indeed, it has been shown that the SuM controls  
102 hippocampal theta rhythm (Kocsis and Vertes 1994, Vertes and Kocsis 1997, Kocsis  
103 and Kaminski 2006) and is involved in emotional learning and memory (Pasquier and  
104 Reinoso-Suarez 1976, Richmond et al 1999, Pan and McNaughton 2002, Santin et al  
105 2003, Pan and McNaughton 2004, Shahidi et al. al., 2004). By combining retrograde  
106 tracing, neurotoxic lesion and FOS immunostaining, it was recently shown that SuML  
107 GABA/Glutamate neurons are responsible for the activation of dDG granule cells during  
108 paradoxical sleep (PS) (Renouard et al., 2015 ; Billwiller et al., 2016). Such activation  
109 may play a key role in the previously reported beneficial effect of PS on learning and  
110 memory (Maquet et al., 2000). In addition, Pedersen and colleagues (2017), by using a  
111 chemogenetic approach in transgenic mice, showed that SuM neurons containing only  
112 VGLUT2 but not those containing VGAT and VGLUT2 play a crucial role in waking.  
113 Altogether these results suggest that glutamatergic neurons from the SuM known to  
114 innervate several limbic regions including the CA2/CA3a hippocampal region and the  
115 vDG are involved in normal wakefulness whereas the GABA/Glutamate SuML neurons  
116 projecting to the dDG could be instrumental for PS function.

117 In this study we investigate how the SuML-dDG pathway control dDG neurons activity  
118 during PS and other vigilance states. For this purpose we combine innovative structural  
119 connectivity techniques using neurotropic viral vectors (rabies virus, AAV),  
120 neurochemical anatomy (immunohistochemistry, *in situ* hybridization) and imaging (light,  
121 electron and confocal microscopy) with *in vitro* (patch clamp) and *in vivo* (LFP, EEG)

122 optogenetic and electrophysiological recordings performed in transgenic VGLUT2-cre  
123 mice in order: 1) to fully characterize the anatomical, neurochemical and  
124 electrophysiological properties of the SuML-dDG projection neurons in our mice  
125 transgenic model and 2) to determine the influences of this specific pathway on  
126 behaviors and associated oscillatory activities characterizing the different vigilance  
127 states as well as DG neuron activity.

128

## 128 **Materials and methods**

### 129 **Animals**

130 For this study, we used 26 transgenic “VGLUT2-cre” adult male mice (25-30 g; aged 10-  
131 11 weeks) obtained by mating male and female homozygote Vglut2-ires-Cre mice from  
132 Jackson Laboratories (Strain name Slc17a6<sup>tm2(cre)Lowl</sup>/J, stock #016963). All mice were  
133 bred in-house and maintained in standard cages, with food and water *ad libitum*, in a  
134 temperature- and humidity-controlled room under a 12 hr light/12 hr dark cycle. All the  
135 surgical and experimental procedures were performed according to the National  
136 Institutes of Health guidelines and the European communities Council Directive of  
137 86/609/EEC and were approved by the University of Aix-Marseille and Lyon University  
138 Chancellor's Animal Research Committees.

139

### 140 **Vectors**

#### 141 ***Rabies virus***

142 Four VGLUT2-cre mice underwent stereotaxic injection of rabies virus (RV) within the  
143 inner molecular layer of the dDG in order to obtain golgi-like retrograde-labeling of SuM  
144 neurons projecting to this region. The strain of RV used was the Challenge Virus  
145 Standard (CVS,  $4.10^7$  plaque-forming units/mL) (Bras et al. 2008; Ugolini 2010; Coulon  
146 et al. 2011). Only vaccinated personnels conducted these experiments at the  
147 appropriate biosafety containment level until the sacrifice of the animals as described  
148 below.

149 These animals were used to determine the neurotransmitter phenotype of SuM neurons  
150 projecting to dDG at the mRNA level, combining immunohistofluorescent detection of RV

151 with fluorescent *in situ* hybridization detection of VGAT and VGLUT2 mRNAs.

152 ***Adeno-Associated Virus (AAV) Double floxed Inverted ORF (DIO) vectors***

153 Thirteen VGLUT2-cre mice underwent stereotaxic injection of the cre-dependent viral  
154 vectors: AAV5-EF1a-DIO-EYFP ( $3.5 \times 10^{12}$  virus molecules / ml; UNC Gene Therapy  
155 Center Vector Core; Dr Deisseroth) into the SuML. These VGLUT2-EYFP mice  
156 expressing the Yellow Fluorescent Protein (YFP) in VGLUT2 SuM neurons and their  
157 axon terminals were used 1) to determine the neurotransmitter phenotype of SuM  
158 neurons innervating the dDG at the protein level, by simultaneous  
159 immunohistofluorescent detection of EYFP labeled axon fibers and terminals, VGAT and  
160 VGLUT2 in dDG (n=3); 2) to determine the synaptic profile of these EYFP labeled axon  
161 terminals at the electron microscopy level (n=3); 3) as control animals (n=3) for *in vitro*  
162 optogenetic stimulation and patch clamp electrophysiological recordings; 4) as control  
163 animals (n=4) for *in vivo* optogenetic stimulation and electrophysiological recordings  
164 followed by cFos immunolabeling.

165 Nine VGLUT2-cre mice underwent stereotaxic injection of the cre-dependent viral  
166 vectors: AAV5-EF1a-DIO-hChR2(H134R)-EYFP ( $3.2 \times 10^{12}$  virus molecules / ml; UNC  
167 Gene Therapy Center Vector Core; Dr. Deisseroth) into the SuML. These VGLUT2-  
168 ChR2 mice expressing the excitatory opsin, channelrhodopsine 2 (ChR2) and the  
169 reporter protein EYFP in VGLUT2 SuM neurons and their axon terminals were used for  
170 1) *in vitro* optogenetic stimulation and patch clamp electrophysiological recordings  
171 experiments (n=5); 2) *in vivo* optogenetic stimulation and electrophysiological recordings  
172 followed by cFos immunolabeling (n=4).

173



174 **Surgery**

175 Mice were anesthetized by an intraperitoneal injection (i.p.) of Ketamin (50mg/kg) /  
176 Xylazine (5mg/kg) solution. If necessary, this anesthesia was repeated during the  
177 surgery. Animals were then secured in a stereotaxic frame (David Kopf instruments).  
178 The body temperature of mice was monitored and maintained at about 37°C during the  
179 entire procedure by means of an anal probe and heating blanket respectively. The head  
180 was shaved and sanitized with Betadine and 0.9% NaCl. Local anesthesia was  
181 performed by infiltration of the scalp with xylocaine (lidocaine hydrochloride 0,5%), and  
182 an ophthalmic gel was placed on the eyes to avoid drying. After scalp incision, holes  
183 were drilled in the skull, with antero-posterior (AP), medio-lateral (ML) and dorso-ventral  
184 (DV) coordinates based on Paxinos & Franklin's atlas (2005).

185 ***RV and AAV viral vector injections***

186 The RV (200 nl) was pressure-injected unilaterally (n=2) or bilaterally (n=2) within the  
187 dDG inner molecular layer of VGLUT2-cre mice according to the following coordinates:  
188 AP = -2; ML = +/-1.5; DV = -1.7. Injections were performed by using a 33-gauge  
189 Hamilton syringe connected to a Micro4 injection pump system (World Precision  
190 Instruments). After completion of the injection procedures, the syringe was removed and  
191 the skin was sutured. Animals were treated with local anesthetic, returned to their cages  
192 kept at the appropriate biosafety containment level for a survival period of 38h to  
193 observe an optimal RV retrograde labeling for the dendritic arbor of SuM neurons.  
194 AAV5-EF1a-DIO viral vectors (500nl) were injected bilaterally within the SuML of  
195 VGLUT2-cre mice at the following coordinates: AP = -2.7; LM = +/-1.25; DV = -4.8 using  
196 an 11° angle to avoid the high vascularization at the midline.

197

## 198 ***Optrode and electrode implantation***

199 After AAV injections, VGLUT2-mice were implanted with an optrode in the left dDG (AP  
200 = -2; ML = -1.1; DV = -1.7) for optic stimulation of axon terminals originating from  
201 transfected SuML neurons and local field potential (LFP) recordings from the DG. The  
202 optrode consisted of an optic fiber (250  $\mu\text{m}$   $\varnothing$ , 0.39 NA; Thorlabs SAS) and the LFP  
203 electrode. The LFP electrodes consisted of two 45  $\mu\text{m}$  diameter tungsten wires  
204 (California Fire Wire Company), twisted and glued together to form a rigid and solid  
205 structure, with the 2 ends of the wires separated by 100  $\mu\text{m}$  from each other. Two small  
206 screws (1 mm in diameter, Plastics One) each soldered to a wire were fixed on the skull.  
207 The first screw was fixed in the parietal part of the skull for EEG recording; the second  
208 screw, at the level of cerebellum as reference electrode. Two wire electrodes were  
209 inserted into the neck muscles for bipolar EMG recordings. All leads were connected to  
210 a miniature plug (Plastics One) that was cemented on the skull.

211 After completion of the surgery the skin was sutured. Mice were treated with local  
212 anesthetic, and an intramuscular injection of antibiotic (Baytril, 5mg/kg) to prevent any  
213 risk of infection. Mice were monitored until waking and replaced in their home cages for  
214 a survival period of 3 weeks.

215

## 216 **Histology**

### 217 ***Tissue preparation for light microscopy***

218 Animals were deeply anesthetized with ketamine and xylazine and transcardially  
219 perfused with 4% paraformaldehyde (PFA) in 0.12 M sodium phosphate buffer, pH 7.4  
220 (PB). After perfusion, the brains were removed from the skull, post-fixed in the same  
221 fixative for 1 h at room temperature (RT), rinsed in PB, cryoprotected in 20% sucrose

222 overnight, frozen on dry ice and sectioned coronally at 40  $\mu$ m with a cryostat (Microm).  
223 The sections were rinsed in PB, collected sequentially in tubes containing an ethylene  
224 glycol-based cryoprotective solution and stored at -20°C until histological processing.  
225 One of every ten sections was stained with cresyl violet to determine the general  
226 histological characteristics of the tissue throughout the rostro-caudal extent of the brain.  
227 Selected sections were processed for 1) simultaneous detection of VGLUT2 mRNA,  
228 VGAT mRNA and RV; 2) simultaneous immunohistofluorescent detection of EYFP,  
229 VGLUT2 and GAD65 or VGAT; 3) immunohistochemical detection of cFos.

230 ***Simultaneous detection of VGLUT2 mRNA, VGAT mRNA and RV combining***  
231 ***fluorescent in situ hybridization (RNAscope technology) and***  
232 ***immunohistofluorescent methods performed in VGLUT2-cre mice injected with RV***

233 Selected sections at the level of the SuM were first treated with 1% H<sub>2</sub>O<sub>2</sub> rinsed in PB  
234 mounted on SuperFrost Plus slides (Fisher Scientific) and air dried at RT. They were  
235 then processed for fluorescent RNAscope *in situ* hybridization according to the  
236 manufacturer's protocol (Advanced Cell Diagnostics). Briefly sections were treated with  
237 100% ethanol and protease III for 30 min at 40°C. They were incubated in a solution  
238 containing both RNAscope® Probe - Mm-S1c17a6 for detection of VGLUT2 mRNA and  
239 Mm-S1c32a1-C3 for detection of VGAT mRNA. After hybridization, sections were then  
240 processed for visualization using the RNA-scope Multiplex Fluorescent reagent Kit v2  
241 (Advanced Cell Diagnostics) and the Tyramide Signal Amplification (TSA™) Plus  
242 Cyanine 3 and TSA Plus Cyanine 5 systems (Perkin Elmer).  
243 After the RNAscope assay, sections were rinsed in 0.02 M potassium phosphate-  
244 buffered saline (KPBS, pH 7.2-7.4) and processed for immunohistofluorescent detection  
245 of the RV using a Mouse On Mouse kit (MOM, Vector Laboratory) to eliminate non

246 specific labeling due to use of mouse monoclonal antibody on mouse tissue. Sections  
247 were incubated for 1 h at RT in MOM mouse IgG blocking reagent diluted in KPBS  
248 containing 0.3% Triton X-100. Sections were rinsed twice with KPBS for 5 min and pre-  
249 incubated in MOM diluent for 15 min. Sections were then incubated overnight at RT in a  
250 solution containing the mouse monoclonal antibody directed against RV (1:3000; Raux  
251 et al., 1997 Kindling provided By Dr. Patrice Coulon), diluted in MOM diluent. After  
252 several rinses in KPBS, they were incubated for 2 h in Alexa488-conjugated donkey  
253 anti-mouse (1:200; Invitrogen) diluted in MOM diluent. After several rinses in KPBS, all  
254 sections were coverslipped with Fluoromount (Electron Microscopy Sciences). The  
255 specimens were analyzed with a Zeiss laser-scanning confocal microscope.

#### 256 ***Quantification of co-localizing RV, VGLUT2 and VGAT mRNAs***

257 Quantitative analysis was conducted to evaluate the extent of SuM neurons with direct  
258 projections to the dDG that co-express VGLUT2 and VGAT mRNAs. For this purpose,  
259 the number of triple neurons was determined for each animal (n=4), from 3 sections  
260 (120  $\mu$ m apart from each other) across the antero-posterior extent of the SuM. For each  
261 section, an image of the entire SuM region was obtained from a single confocal slice  
262 using the Tile Scan function with a 20x objective and sequential acquisition of the  
263 different wavelength channels to avoid fluorescent talk with ZEN software (Zeiss). The  
264 analysis was then performed with Neurolucida software (version 7, mbfBioscience) as  
265 follows: for each confocal image, all RV- labeled neurons were identified on the green  
266 channels and examined for colocalization of VGLUT2 mRNA in the blue channel and/or  
267 VGAT mRNA in the red one. Triple- double- and single-labeled neurons were tagged  
268 differently and counted by the software. A total of 380 RV-labeled neurons were  
269 analyzed.

270 ***Simultaneous immunohistofluorescent detection of EYFP, VGLUT2 and GAD65 or***  
271 ***VGAT performed in VGLUT2-EYFP mice***

272 Selected sections at the level of the dDG were processed using the MOM kit as  
273 described above. Sections were incubated overnight at RT in a solution containing rabbit  
274 anti-GFP (1:2000, Invitrogen), guinea pig anti-VGLUT2 (1:5000, Millipore) and mouse  
275 anti-GAD65 (1:100, Millipore) or mouse anti-GFP (1:100, Invitrogen), guinea pig anti-  
276 VGLUT2 (1:5000, Millipore) and rabbit anti-VGAT (1:1000, Synaptic System) diluted in  
277 MOM diluent. After several rinses in KPBS, they were incubated for 2 h in Alexa488-  
278 conjugated donkey anti-rabbit IgG (1:200; Invitrogen), Cy5-conjugated donkey anti-  
279 guinea pig (1:100; Jackson ImmunoResearch Laboratories, Inc.), and Cy3-conjugated  
280 donkey anti-mouse (1:100; Jackson ImmunoResearch Laboratories, Inc.) or Alexa488-  
281 conjugated donkey anti-mouse IgG (1:200; Invitrogen), Cy5-conjugated donkey anti-  
282 guinea pig (1:100; Jackson ImmunoResearch Laboratories, Inc.), and Cy3-conjugated  
283 donkey anti-rabbit (1:100; Jackson ImmunoResearch Laboratories, Inc.) diluted in MOM  
284 diluent. After several rinses in KPBS, all sections were then mounted on superfrost-  
285 coated slides, dried overnight at RT and coverslipped with Fluoromount. The specimens  
286 were analyzed with confocal microscope (Zeiss).

287 ***Quantification of co-localizing GFP, VGLUT2 and VGAT***

288 Two quantification protocols were used in order to evaluate the extent of the different  
289 neurochemical phenotypes of axon terminals from the SuM innervating the dDG. In the  
290 first protocol previously described (Soussi et al., 2015), the densities of VGLUT2/VGAT  
291 and VGLUT2 only labeled terminals were assessed by the quantification of  
292 immunolabeling for VGLUT2/VGAT and VGLUT2 only, respectively. These analyses  
293 were performed on 4 sections for each mouse. Single optical confocal images were

294 acquired with Zeiss LSM 510 laser-scanning microscope and analyzed with the software  
295 provided by the microscope manufacturer (LSM 510 Zen, Zeiss). All images were  
296 acquired from the suprapyramidal and infrapyramidal blades of the dDG, using identical  
297 parameters. The percentages of VGLUT2 labeled terminals containing VGAT were  
298 estimated by the the Manders' coefficient (proportion of pixels for VGLUT2 also positive  
299 for VGAT) obtained with the JACoP co-localization Plugin for Image J, in the region of  
300 interest (ROI) which included granule cell layer (GCL) and the narrow zone superficial  
301 to the granule cells defined as the supragranular layer (SGL) following recommendations  
302 from Bolte & Cordelières (2006). For each channel, an identical bottom threshold was  
303 applied throughout the analyses, and only the pixels with a value above this threshold  
304 were counted. When a pixel had a value above the threshold in both channels, it was  
305 counted as double positive. The size and the shape of the ROI was the same for each  
306 confocal image. The average % of co-localization was calculated for each blade of the  
307 DG for each mouse.

308 In the second quantification protocol, we determined for each mouse (n=4), the relative  
309 percentages of triple- and double-labeled boutons for the GFP anterograde tracer and  
310 VGAT and/or VGLUT2 in the SGL and infragranular blade of the dDG from several z-  
311 stacks of 10 confocal slices, acquired with the 100X objective and a numerical zoom 8,  
312 in three different sections. The analysis was performed as previously described  
313 (Persson et al., 2006; Soussi et al., 2010) and following recommendations from Bolte &  
314 Cordelières (2006). For each z-stack, the confocal images obtained from separate  
315 wavelength channels (green, red and blue) were displayed side by side on the computer  
316 screen together with the images corresponding to colocalized pixels within each optical  
317 slice of the z-stack obtained with the colocalization highlighter plugin in ImageJ. The

318 GFP-labeled boutons were identified in the green channel within a probe volume defined  
319 by the size of the confocal slice (19.38  $\mu\text{m}$  · 19.38  $\mu\text{m}$ ) and the height of the z-stack (2  
320  $\mu\text{m}$ ). Each bouton was examined for colocalization through the individual optical slices of  
321 the z-stack. Single-, double- and triple-labeled boutons were counted using the Cell  
322 Counter plugin in Image J. The total number of GFP-labeled terminals analyzed in the  
323 two regions of interest was 400.

324 ***Immunohistochemical detection of cFos performed in VGLUT2-EYFP (n=4) and***  
325 ***VGLUT2-ChR2 (n=4) mice***

326 Selected sections at the level of the DG were processed for immunohistochemistry  
327 according to previously described protocol (Esclapez et al. 1994). Sections were pre-  
328 treated for 30 min in 1 % H<sub>2</sub>O<sub>2</sub>, rinsed in PB and KPBS, preincubated for 1 h in 3 %  
329 normal goat serum (NGS, Vector Laboratories) diluted in KPBS containing 0.3 % Triton  
330 X-100 and incubated overnight at RT in cFos rabbit polyclonal antiserum (1:20,000;  
331 Calbiochem) diluted in KPBS containing 1 % NGS and 0.3 % Triton X-100. After several  
332 rinses in KPBS, sections were incubated for 1 h at RT in biotinylated goat anti-rabbit  
333 immunoglobulin G (IgG; Vector Laboratories) diluted 1:200 in KPBS containing 3 % NGS  
334 and then for 1 h at RT in an avidin-biotin-peroxidase complex solution prepared in KPBS  
335 according to the manufacturer's recommendations (Vectastain ABC kit, Vector  
336 Laboratories). Sections from VGLUT2-EYFP and VGLUT2-ChR2 mice were processed  
337 in parallel and for the same period of time (15 min) in 3,3'-diaminobenzidine  
338 tetrahydrochloride (DAB, Sigma fast tablets; Sigma), rinsed in KPBS, mounted onto  
339 Superfrost Plus slides, dehydrated and coverslipped with Permount.

340

341 ***Quantification of cFos immunolabeled neurons***

342 The number of cFos labeled neurons was calculated in the DG GCL of the right and left  
343 (ipsilateral to the optic stimulation) hemispheres in VGLUT2-EYFP control (n=4), and  
344 VGLUT2-ChR2 (n=4) mice. These analyses were performed using a computer-assisted  
345 system connected to a Nikon 90i microscope and the Neurolucida software  
346 (MicroBrightField). A total of 4 sections (400  $\mu$ m apart from each other) surrounding the  
347 optrode site were analyzed for each animal. In each section the GCL was delineated  
348 and all neurons labeled for cFos were plotted. The software calculated the total number  
349 of labeled neurons in each hemisphere for each animal. The average total number of  
350 labeled neurons / hemisphere  $\pm$  SEM was calculated for each group of control VGLUT2-  
351 EYFP and VGLUT2-ChR2 mice. Statistical analysis was performed by Statview software  
352 using Wilcoxon Rank Sum Test.

353 ***Tissue preparation for electron microscopy***

354 Three VGLUT2-EYFP mice were perfused intracardially with a fixative solution  
355 containing 4% PFA and 0.1% glutaraldehyde in 0.12 M PB. After perfusion, the brain  
356 was removed from the skull, post-fixed in the same fixative overnight at 4°C and rinsed  
357 in PB for 1.5 h. Blocks of the forebrain were sectioned coronally at 60  $\mu$ m with a  
358 vibratome. Pre-embedding immunolabeling for GFP sections at the level of dDG were  
359 pre-treated for 15 min in 1% sodium borohydride prepared in PB and rinsed for 30 min in  
360 PB and 3 x 30 min in KPBS. Sections were incubated for 1h in normal goat serum  
361 diluted in 0.02M KPBS, then incubated overnight in primary antibody rabbit anti-GFP  
362 (1:2000) diluted in KPBS containing normal goat serum at RT. On the following day  
363 sections were rinsed for 1.5 h in 0.02M KPBS then incubated for 1h in the secondary  
364 antibody goat anti-rabbit (1:200) diluted in KPBS containing normal goat serum. After



365 rinsing in KPBS for 1.5 h, sections were incubated for 1h in an avidin-biotinylated-  
366 peroxidase complex (ABC Elite; Vector Laboratories) prepared in KPBS. After 3 x 30  
367 min rinses in KPBS, sections were incubated for 12 min in 3.3'-diaminobenzidine  
368 tetrahydrochloride and 0.01% H<sub>2</sub>O<sub>2</sub>, rinses in KPBS, post-fixed in 2% PFA and  
369 2.5% Glutaraldehyde diluted in PB for 3 h, then washed for 1.5 h in PB. After all these  
370 steps, sections were treated with 1% osmium tetroxide in PB for 45 min, dehydrated in  
371 ethanol, flat embedded in Durcupan resin and polymerized at 56°C for 24 h (Zhang &  
372 Houser, 1999). Labeled regions of the DG that contained the molecular and granule cell  
373 layers were trimmed from the sections, re-embedded on capsules filled  
374 with polymerized Durcupan and further polymerized at 56°C for an additional 24 h.  
375 Ultrathin sections from the most superficial face of the blocks were cut on an  
376 ultramicrotome. Serial sections were picked up on nickel mesh grids and stained with  
377 uranyl acetate and lead citrate. Sections were examined and photographed with a JEOL  
378 electron microscope.

379

### 380 ***In vitro* electrophysiology: optic stimulation and patch clamp recordings**

#### 381 ***Hippocampal slice preparation***

382 VGLUT2-ChR2-EYFP mice (n=5) and VGLUT2-EYFP mice (n=3) were decapitated  
383 under isofluorane anesthesia. Brains were quickly removed and placed into an ice-cold  
384 (4°C) cutting solution containing (in mM): 140 potassium gluconate, 10 HEPES, 15  
385 sodium gluconate, 0.2 EGTA, 4 NaCl (pH 7.2). Coronal slices were cut (350 µm) using a  
386 vibratome (Leica Microsystem). In order to increase cell survival over time in slices from  
387 10 to 11 week-old adult, slices were incubated first in a solution containing (in mM): 110  
388 choline chloride; 2.5 KCl; 1.25 NaH<sub>2</sub>PO<sub>4</sub>; 10 MgCl<sub>2</sub>, 0.5 CaCl<sub>2</sub>; 25 NaHCO<sub>3</sub>; 10 glucose,

389 5 sodium pyruvate, for 15 min at 20-23°C. Then, they were transferred to a holding  
390 chamber containing an artificial cerebrospinal fluid (ACSF) composed of (in mM) 126  
391 NaCl, 3.5 KCl, 1.2 NaH<sub>2</sub>PO<sub>4</sub>, 1.3 MgCl<sub>2</sub>, 2 CaCl<sub>2</sub>, 25 NaHCO<sub>3</sub>, 10 D-glucose (pH = 7.3-  
392 7.4) at RT for at least 1 h before recording. The two last solutions were saturated with  
393 95% O<sub>2</sub> and 5% CO<sub>2</sub>.

#### 394 ***Whole-cell voltage-clamp recordings***

395 Slices were submerged in a low-volume recording chamber and continuously  
396 superfused with 32-34°C ACSF at 5 ml/min perfusion rate. For each mouse, four slices  
397 containing the dDG were selected for patch clamp recordings. DG neurons were  
398 visualized by infrared video microscopy using an upright microscope (SliceScope,  
399 Scientifica Ltd). Patch pipettes were pulled from borosilicate glass tubing (1.5 mm outer  
400 diameter, 0.5 mm wall thickness) and filled with an intracellular solution containing (in  
401 mM) 20 CsCl, 115 CsGlu, 10 HEPES, 1.1 EGTA, 4 MgATP, 10 Na phosphocreatine and  
402 0.4 Na<sub>2</sub>GTP as well as 0.2% biocytin for *post-hoc* morphological identification of the  
403 recorded neuron (see below). The pipette resistance was 4–6 MΩ. Recordings were  
404 performed in the Apex, upper and lower blades of the dDG. Signals were fed to a  
405 Multiclamp 700A (Molecular Devices), digitized (10 kHz) with a DigiData 1550  
406 (Molecular Devices) interface to a personal computer and analysed with ClampFit  
407 software (Molecular Devices). Optical stimulation of ChR2-expressing axon terminals  
408 was performed by pulses of 470 nm blue light delivered by a LED (pE-2, CoolLED)  
409 through a 40X objective attached to microscope (SliceScope, Scientifika Ltd).  
410 Stimulations consisted of paired 5 ms pulses (500 ms between pulses, every 30 s). For  
411 VGLUT2-ChR2 mice, the light intensity corresponded to 20-30% (1.6-2.5 mW) of the  
412 LED maximum power (7.5 mW) and for the VGLUT2-EYFP control mice, it varied

413 between 20 to 90% (6.9 mW) of LED maximum power. Postsynaptic current (PSC)  
414 responses to optic stimulations were recorded at different holding potentials ranging  
415 from -70 mV (close to reversal potential of GABA-A currents but far below the reversal  
416 potential of glutamate receptor-mediated currents) to +10mV (close to reversal potential  
417 of glutamate receptor-mediated currents but far above the reversal potential of GABA-A-  
418 mediated currents). Pharmacological characterization of inhibitory PSCs (IPSCs) and  
419 excitatory PSCs (EPSCs) was achieved using antagonists of GABA-A, AMPA and  
420 NMDA receptors. We used Gabazine or bicuculline (antagonist of GABA-A receptors,  
421 10  $\mu$ M), D-AP5 (antagonist of NMDA receptors, 40  $\mu$ M) and NBQX (antagonist of AMPA  
422 and Kainate receptors, 10  $\mu$ M). The co-release of glutamate and GABA was further  
423 demonstrated in several DG granule cells (n=5), by recording first light stimulated PSC  
424 at -70 mV (Figure 4K). At this holding potential the recorded currents were essentially  
425 generated by glutamate receptors. Then the glutamate component was abolished by  
426 NBQX and D-AP5, and the GABA component was revealed at +10 mV holding potential.  
427 This PSC was completely inhibited by bicuculline application that confirmed the GABA  
428 receptor origin of these remaining currents (see also Figure 4J).

#### 429 ***Double immunohistofluorescent labeling for Biocytin and GFP***

430 After recordings slices were processed for simultaneous detection of the biocytin-filled  
431 neurons and GFP-labeled axon fibers and terminals in order to identify the recorded  
432 cells and evaluate the efficiency of the transfection, respectively. Slices were fixed  
433 overnight at 4°C in a solution containing 4% PFA in PB. Then they were rinsed in PB,  
434 cryoprotected in 20% sucrose and quickly frozen on dry ice. After several rinses in  
435 KPBS, slices were incubated in a solution containing normal donkey serum (NDS, 1:30;  
436 Vector Laboratory) diluted in KPBS with 0.3% Triton- X100, for 2 h at RT. They were

437 incubated in a solution containing goat anti-biotin (1:200) and rabbit anti-GFP (1:2000),  
438 diluted in KPBS containing 0.3% Triton-X100 and NDS (1:100), overnight at RT. After  
439 several rinses in KPBS, slices were incubated for 2 h in Alexa488-conjugated donkey  
440 anti-goat IgG (1:200; Invitrogen), and Cy3-donkey anti-rabbit IgG (1:100) diluted in  
441 KPBS with 0.3% Triton-X100. After rinses in KPBS, slices were mounted on slides and  
442 coverslipped with Fluoromount. The specimens were analyzed with a fluorescence  
443 microscope (Nikon 50i) or confocal microscope (Zeiss).

444

#### 445 ***In vivo* electrophysiology: optic stimulation, LFP and EEG recordings**

446 All mice were placed for 7 days in a recording box in order to get them used to the  
447 recording conditions. The recording box was ventilated, as well as electrically and sound  
448 isolated. The temperature was regulated at 21°C, and a 12 h light/12 h dark cycle  
449 imposed. Mice were accustomed to the cable connecting them to the recording device.  
450 The recording cable connected the micro-connector implanted on the head of the animal  
451 to a collector, which ensured the continuity of the recorded signals without hindering the  
452 movements of the mouse. At the end of this habituation, the control recordings begun.  
453 EEG and EMG recordings were digitized at 1 kHz, amplified 5000 times with a 16  
454 channels amplifier (A-M System) and collected on a computer via a CED interface using  
455 Spike 2 software (Cambridge Electronic Design). The signal was band-pass filtered  
456 online between 1 and 300 Hz for EEG, and between 10 and 100 Hz for EMG. The 50 Hz  
457 signal was removed with a notch filter. The EEG and LFP signals were acquired by  
458 monopolar derivation (differential between the recording electrode and the reference  
459 electrode located above the cerebellum). The EMG bipolar signals were calculated by

460 measuring the differential between the two EMG electrodes. Mice were recorded for 24  
461 h of baseline followed by optogenetic manipulation.

### 462 ***In vivo optogenetic stimulation***

463 Optical stimulations were delivered via a patch cable connected to a 100 mW 473-diode  
464 (Laserglow). Stimulations were performed during 4 days: in the first 3 days, mice were  
465 stimulated during one specific vigilance state par day: waking (WK), slow wave sleep  
466 (SWS) or PS. Each day, stimulations were delivered during the same circadian period  
467 (10 AM–2 PM). Stimulations were applied 10 s after the occurrence of a stable WK,  
468 SWS or PS event as detected by real time observation by the experimenter. For WK and  
469 SWS, stimulations were spaced apart by at least 1 min and for PS, by at least 15 s.

470 Blue exciting stimulations consisted of 10-s trains of 10-ms pulses at 20 Hz. Light power  
471 at the fiber tip was 10 mW.

472 The 4<sup>th</sup> day of experiments, 4 VGLUT2-EYFP and 4 VGLUT2-ChR2 animals were  
473 stimulated for 15 min at 20 Hz (10-ms pulses). All mice were euthanized 90 min after the  
474 beginning of the stimulation by transcardiac perfusion of 4% PFA. Brain tissues were  
475 processed for immunohistochemical detection of cFos expression (see above).

### 476 ***Analysis of the sleep wake states***

477 Polysomnographic recordings were visually scored by 5 s epochs for WK, SWS and PS  
478 as previously described (Sapin et al. 2009). Hypnograms were obtained by using a  
479 custom Matlab script. For each animal, the number of awakenings during SWS and PS  
480 optogenetic stimulations was counted and expressed as percentage of the total number  
481 of stimulations.

482

483

484 ***LFP and EEG analysis***

485 LFP and EEG signals were analyzed using a custom Matlab script using the Chronux  
486 toolbox. The time-frequency spectrograms were computed with the same toolbox and  
487 expressed in arbitrary units. The mean power spectral density in the 10 s before the  
488 stimulation was compared to that in the 10 s during the stimulation (sliding window: 1 s),  
489 in order to obtain a mean spectral power ratio (PR)  $\pm$  SEM. The frequency spectra were  
490 grouped into frequency bands commonly used Delta: 1-4 Hz, Theta: 6-12 Hz, Sigma: 12-  
491 14 Hz, Beta: 15-30 Hz, Gamma: 30-100 Hz. Power spectral values at 20 Hz and its  
492 harmonics were excluded from the analysis.

493 To analyze the evolution of LFP and EEG theta and gamma bands during optogenetic  
494 stimulation, the mean PR of these spectral bands and the respective 95% confidence  
495 intervals were calculated from 10 s before to 10 s after the photostimulation. In order to  
496 compute these intervals, we used a bootstrap procedure, which allows creating artificial  
497 groups from the original data, with replacement. The mean of each artificial group  
498 derived from the original data was then computed. This operation was repeated 10000  
499 times and the 95% confidence interval was the 5<sup>th</sup> and the 95<sup>th</sup> percentile of the means  
500 of the randomly constructed samples.

501 Finally, during WK and PS the peak of theta frequency (6-12 Hz) in the 10 s before and  
502 during the optogenetic stimulation was identified in all animals.

503 Analysis of variance (Mann-Whitney test) was performed on the percentage of  
504 awakenings, the mean spectral power ratios and the theta frequency peaks. These  
505 statistics were performed using Statview software (StatView Inc, Nestbit, NS).

506

507

508 ***EMG analysis***

509 EMG signals during WK were analyzed using a custom Matlab script. The mean EMG  
510 value in the 10 s before the stimulation was compared to that in the 10 s during the  
511 stimulation, in order to obtain a mean EMG ratio  $\pm$  SEM. In the 2 groups of animals we  
512 performed a sequential analysis per 0.5 s on the mean of the absolute EMG values from  
513 20 seconds before to 10 seconds after the photostimulation. The respective bootstrap  
514 95% interval (computed as described above) was calculated for each sequential value.  
515 Further, analysis of variance (Mann-Whitney test) was performed on the EMG mean by  
516 using Statview software.

517

518

## 518 **Results**

### 519 **Distribution of VGAT and/or VGLUT2 mRNA-containing neurons in the SuM of** 520 **VGLUT2-Cre transgenic mice**

521 Three populations of VGAT and/or VGLUT2 mRNA-containing neurons were observed  
522 at all antero-posterior levels of the SuM. These included a population of large neurons  
523 co-expressing VGAT and VGLUT2 mRNA (Figure 1 A, D, arrows); and two populations  
524 of smaller neurons containing either VGAT mRNA (Figure 1 A, D, arrowheads) or  
525 VGLUT2 mRNA (Figure 1 A, D, blue). The distribution as well as the density of these  
526 populations differed significantly within the SuM. Almost all VGAT/VGLUT2 mRNAs –  
527 containing neurons were clustered around and above the mammillary tract (mt) (Figure 1  
528 A, D) in a region similar to that described in rats as the grandicellular SuM (SuMg) by  
529 Pan and Mc Naughton (2004) and that is included in the lateral SuM (SuML) region of  
530 Paxinos and Franklin's mouse Atlas. The numerous singly labeled VGLUT2 mRNA -  
531 expressing cells were small and mostly located in the most central area (Figure 1 A)  
532 termed the parvicellular SuM (SuMp) by Pan & Mc Naughton (2004) corresponding to  
533 the SuMm in Paxinos and Franklin's mouse Atlas. Some were also intermingled with the  
534 larger VGAT/VGLUT2 mRNAs-containing cells in the SuMg. Few neurons expressed  
535 VGAT mRNA only. These neurons were scattered within the SuML and SuMM.

536 In summary, our results indicate that in mice like in rats a large number of neurons co-  
537 expressing markers of GABAergic and glutamatergic transmission are located in the  
538 SuML region.

539

540



541 **Distribution of SuM neurons with dorsal dentate gyrus (dDG) projections**

542 Unilateral or bilateral injections of rabies-virus (RV) were performed into the DG of the  
543 dorsal hippocampal formation (Figure 1 B, insert) to evaluate the distribution and  
544 proportion of SuM neurons that project to this structure. In all these mice, the RV tracer  
545 injection was located either in the granule cell layer or inner molecular region of the  
546 dorsal blade of the DG. Within the SuM, all these animals displayed retrogradely labeled  
547 neurons exclusively in the region of SuML (SuMg) immediately dorsal to the mt (Figure 1  
548 B, E, H). Virtually none were found in the SuMM (Figure 1 B). Many of these neurons  
549 displayed a large soma with several labeled proximal dendrites (Figure 1 E). Therefore  
550 in mice, SuM neurons innervating the dDG are located in the SuML as in rats (Soussi et  
551 al., 2010).

552

553 **Neurotransmitter phenotype of SuM neurons projecting to the dDG revealed by**  
554 **simultaneous detection of RV retrograde tracer, VGAT mRNA, and VGLUT2 mRNA**

555 We next investigated whether the SuML neurons projecting to the dDG express markers  
556 of GABAergic and glutamatergic transmissions. Sections processed for simultaneous  
557 detection of VGAT mRNA, VGLUT2 mRNA and RV (Figure 1 A-I) showed that almost all  
558 RV retrogradely-labeled neurons co-express VGAT and VGLUT2 mRNAs (Figure 1 A-I,  
559 arrows). These data were confirmed by quantitative analysis performed on twelve  
560 sections (4 mice; 3 sections per mouse) showing that 99% (n= 378 out of 380 neurons)  
561 of the RV-labeled neurons co-expressed VGAT and VGLUT2 mRNAs. The percentages  
562 of these triple-labeled cells were the same (99%) for the three antero-posterior levels of  
563 the SuM analyzed (range 98%-100%).

564

565 **Distribution and neurotransmitter phenotype of fibers and axon terminals**  
566 **originating from SuM neurons innervating the dorsal dentate gyrus**

567 To further characterize the neurochemical properties of SuML neurons innervating the  
568 dDG, AAV-5-DIO-EYFP was injected bilaterally in the SuML (Figure 2 A) allowing  
569 specific EYFP labeling of VGLUT2 neurons and of their axon fibers innervating the  
570 hippocampus including the dDG (Figure 2 A). Sections of these VGLUT2-EYFP mice  
571 were processed for simultaneous immunohistofluorescent detection of EYFP, VGLUT2  
572 and VGAT or GAD65. All mice injected in the SuML displayed numerous anterograde-  
573 EYFP labeled fibers and axon terminals in the dDG (Figure 2 B, arrowheads) on both  
574 sides of the hippocampal formation. Labeled fibers and axon terminals were also  
575 present in the CA2 /CA3a region of the hippocampus in particular when the injection  
576 sites involved more posterior levels of the SuML (Figure 2 B, arrowheads).

577 In the dDG, EYFP axonal fibers and terminals were mainly located in the supragranular  
578 layer of the dorsal and ventral blades of the DG (Figure 2 B-D) although some were  
579 localized in the granule cell layers. In all triple labeled sections either for EYFP, GAD65  
580 and VGLUT2 or EYFP, VGAT and VGLUT2, the vast majority if not all EYFP-containing  
581 axon terminals present in the supragranular and granule cell layers were labeled for both  
582 GAD65 and VGLUT2 (Figure 2 C, E-H) or VGAT and VGLUT2 (Figure 2 D, I-L).  
583 Quantitative analysis of double labeling for VGLUT2 and VGAT showed that 90% (range  
584 82% to 99%) of VGLUT2 labeled terminals were labeled for VGAT with no major  
585 differences between the infragranular blade (89%; range 82% to 99%) and the  
586 supragranular blade (91%; range 83% to 99%). Further quantification of EYFP labeling  
587 revealed that 98 % (range 96% and 100%) of the axon terminals contained both VGAT  
588 and VGLUT2 confirming that all EYFP-containing axon terminals originating from SuML

589 neurons contained both markers of GABA and glutamate neurotransmissions.

590

591 **Electron microscopy analysis of synaptic contacts established by EYFP-**  
592 **containing axon terminals originating from SuML neurons**

593 In the supragranular region of the dDG, axon terminals from SuML neurons labeled for  
594 EYFP displayed diffuse electron-dense labeling that contrasted with adjacent unlabeled  
595 cellular compartments. These labeled axon terminals formed synaptic contacts on the  
596 soma (Figure 3 A, B, D, E, F, I) and dendritic profiles (Figure 3 C, G, H) of presumed  
597 granule cells (GCs). These axon terminals were often very large boutons that displayed  
598 one (Figure 3 A, B, D, E) or more (Figure 3 F) synaptic zones with relatively thin post-  
599 synaptic densities (arrowheads) characteristic of symmetric synapses. Other synaptic  
600 contacts formed by these labeled terminals displayed thicker post-synaptic densities  
601 characteristic of asymmetric synapses (Figure 3 A, B, C; arrow). We also observed large  
602 labeled “en passant” boutons establishing symmetric synapses on the dendrites of a  
603 presumed granule cell (Figure 3 G, H). Finally, some axon terminals from SuML neurons  
604 formed both symmetric (arrowhead) and asymmetric (arrow) synapses on the soma or  
605 the proximal dendrite of two different neighboring GCs (Figure 3, A, B).

606 Together these data demonstrate that in mice all SuM neurons innervating the dDG  
607 belong to a single population of large neurons located in the SuMg region of the SuML.  
608 These cells display a dual neurochemical phenotype for GABA and glutamate  
609 neurotransmissions and establish symmetric (presumably inhibitory) and asymmetric  
610 (presumably excitatory) synapses on the GCs of the dDG.

611

612

### 613 **Co-release of glutamate and GABA at the SuML-dentate granule cells synapses**

614 The neurochemical profile of SuML neurons projecting to the dDG strongly suggested  
615 that they co-release GABA and glutamate at the SuML-dentate granule cells synapses.  
616 To test this hypothesis, we performed patch clamp recordings of dDG granule cells layer  
617 using optogenetic stimulation in hippocampal slices obtained from VGLUT2-ChR2 mice  
618 (5 mice, 3 sections per mouse, 16 neurons) and VGLUT2-EYFP control mice (3 mice, 3  
619 sections per mouse, 10 neurons) (Figure 4). The light stimulation of SuML-DG fibers and  
620 axonal terminals expressing ChR2 (Figure 4 A) evoked a fast inward and a slower  
621 outward synaptic current in fourteen out of sixteen neurons recorded at a holding  
622 potential of -30 mV (Figure 4 D, F, H). Post-hoc immunodetection of biocytin-filled  
623 neurons showed that all these recorded neurons correspond to GCs (Figure 4 C, E, G,  
624 I). They were equally distributed in the apex and the upper and lower blades of dDG  
625 granule cell layer (Figure 4 B). These GCs were additionally recorded at different holding  
626 potentials. At -10 mV and +10 mV (close to the reversal potential of the glutamatergic  
627 receptor-mediated currents), only the outward (positive going) synaptic current was  
628 observed (Figure 4 D, see also F, H). From -70 mV to -50mV (close to the reversal  
629 potential of GABA-A receptor-mediated currents) only the inward (negative going)  
630 synaptic current was observed (Figure 4 D, see also 4 F, 4 H). At intermediate holdings,  
631 from -30 to -20mV, the light-evoked synaptic currents displayed both inward and  
632 outward components (Figure 4 D, F, H). Using a pharmacological approach, we  
633 confirmed the nature of these currents. Bath application of a mixture of AMPA/Kainate  
634 and NMDA receptor antagonists (NBQX 10  $\mu$ M and D-AP5 40  $\mu$ M) abolished the inward  
635 component (Figure 4 F, K, L, red trace) while GABA-A receptor blockers inhibited the  
636 outward component (Figure 4 H, J- gabazine; K, L- bicuculline, green trace).

637 Quantitative analysis performed in 5 DG neurons (Fig. 4 K) further illustrated that in  
638 regular ACSF the repetitive light pulses (5 ms, 0.05 Hz) evoked postsynaptic currents  
639 (PSC) of relatively stable amplitude ( $1.00 \pm 0.26$  normalized, Fig. 4 K, L, left hand side  
640 red trace is an example of an averaged response of one neuron). The application of  
641 glutamate receptor blockers (10  $\mu$ M NBQX + 40  $\mu$ M D-AP5) reduced the peak amplitude  
642 by 84% ( $0.16 \pm 0.15$ ,  $p < 0.01$ ,  $n = 5$ , paired Wilcoxon test). The remaining response seen  
643 in 4 out of 5 neurons was probably due to GABA-A mediated current because at -70 mV  
644 the driving force for chloride driven currents is close to but is not zero (Figure 4 K, L, red  
645 trace in the middle). Therefore in case of GABA massive release some inward current  
646 is still possible. Indeed a switch to  $V_h = 10$  mV revealed a large PSC response to light  
647 stimulation (Figure 4 L, green trace in the middle) which had a stable amplitude ( $1.00 \pm$   
648  $0.20$  normalized), and was subsequently reduced to 12% ( $0.12 \pm 0.16$ ,  $p < 0.01$ ,  $n = 5$ ,  
649 paired Wilcoxon test) by the addition of 10  $\mu$ M bicuculline to the ACSF already  
650 containing GluR blockers (Figure 4 L, green trace at left). In 3 out of 5 neurons,  
651 bicuculline completely abolished the synaptic response to light pulses after 6 min of drug  
652 perfusion. In two neurons the small remaining current was probably due to the fact that  
653 bicuculline is a competitive antagonist and can be displaced when large quantities of  
654 GABA are released. All these results indicate that the inward synaptic current  
655 component is mediated by glutamate and the outward component by GABA.  
656 Importantly, the disappearance of the inward (glutamatergic) component induced by the  
657 light stimulation in the presence of NBQX and D-AP5 antagonists (red trace) did not  
658 affect the outgoing (GABAergic) currents (Fig. 4 F). In two GCs (Figure 4 I), the  
659 disappearance of the glutamate response (incoming current recorded at -30 mV) in the

660 presence of NBQX and AP5 (red trace) unmasked the GABAergic component (outgoing  
661 current) abolished after addition of gabazine (green trace) (Figure 4 J).

662 The very short latency of the glutamatergic inward and GABAergic outward currents  
663 recorded in a GC after light stimulation of ChR2 containing axon terminals, and the  
664 persistence of GABAergic outflow current in the presence of NBQX and AP5 indicates  
665 that the GABAergic current results from direct light stimulated GABA release and not  
666 from the excitation of DG GABAergic neurons by light stimulated glutamate release.  
667 Together, these results suggest that activation of SuML axon terminals produce  
668 monosynaptic glutamatergic and GABAergic currents on their targets.

669 Finally, we verified that light stimulation (5 ms, 10%, 50% 90% max power LED) of fibers  
670 and axon terminals expressing EYFP on slices of control VGLUT2-EYFP mice (n= 3) did  
671 not evoke any response in the recorded GCs (n= 10) (Figure 4 M, N).

672

### 673 **Effect of optogenetic stimulation of SuML axon terminals innervating the dDG on** 674 **behavior, LFP and EEG spectral content**

675 We analysed the effects of light stimulation of SuML axon terminals innervating the dDG  
676 on behavioral states, spectral content of the LFP recorded in dDG and cortical EEG in  
677 VGLUT2-ChR2 (n= 4) and control VGLUT2-EYFP mice (n= 4).

678 Light activation of SuML axon terminals in VGLUT2-ChR2 mice during waking (WK),  
679 induced a strong and significant increase in EMG value as compared to control mice  
680 (mean EMG ratio, VGLUT2-EYFP=  $0.9 \pm 0.03$ , VGLUT2-ChR2=  $2.0 \pm 0.31$ ,  $p= 0.0209$ ).  
681 The increase in EMG was due to an increase in animal movements (Figure 5 A, D). It  
682 was associated with a slight but not significant increase in theta power in the dDG LFP  
683 (Figures 5 B; 6 A) and the EEG (Figure 7 A) compared to control VGLUT2-EYFP mice.

684 However, theta/delta ratio was significantly increased both in the dDG LFP (Figure 6 A,  
685 B) and the EEG (Figure 7 C, D) during the stimulation compared to control mice (LFP:  
686 VGLUT2-ChR2=  $1.3 \pm 0.11$ , VGLUT2-EYFP=  $0.9 \pm 0.02$ ,  $p=0.0209$ , EEG: VGLUT2-  
687 ChR2=  $2.2 \pm 0.31$ , VGLUT2-EYFP=  $0.9 \pm 0.05$ ,  $p=0.0209$ ). The frequency at the theta  
688 peak was slightly but not significantly increased during stimulation as compared to  
689 control VGLUT2-EYFP animals (LFP: VGLUT2-ChR2:  $8.43 \pm 0.43$  Hz, VGLUT2-EYFP:  
690  $6.96 \pm 0.23$  Hz,  $p= 0.0833$ ) (Figures 5 B; 6 D). Gamma power (30-100 Hz) was  
691 significantly increased during the stimulation in VGLUT2-ChR2 mice as compared to  
692 control mice in the dDG LFP (VGLUT2-ChR2=  $1.6 \pm 0.13$ , VGLUT2-EYFP=  $1.0 \pm 0.02$ ,  
693  $p=0.0209$ ) (Figures 5 C; 6 A, C) and in the EEG (VGLUT2-ChR2:  $1.68 \pm 0.05$ , VGLUT2-  
694 EYFP:  $0.98 \pm 0.02$ ,  $p=0.0209$ ) (Figure 7 B, C, E). The increase occurred immediately  
695 after the beginning of the stimulation and lasted until the end of it (Figures 6 C; 7 E).

696 Stimulations during SWS induced significantly more often an awakening in VGLUT2-  
697 ChR2 than in control VGLUT2-EYFP mice ( $p=0.0209$ , VGLUT2-ChR2: 80 % of the  
698 cases, range 40%-100%; VGLUT2-EYFP: 15 % of the cases, range: 0%-30%; Figure 5  
699 E, H). The induced waking state lasted at least the duration of the stimulation and was  
700 characterized by a significant increase in theta/delta ratio (LFP: VGLUT2-ChR2=  $1.3 \pm$   
701  $0.14$ , VGLUT2-EYFP=  $1.0 \pm 0.02$ ,  $p=0.0433$ ; EEG: VGLUT2-ChR2=  $1.5 \pm 0.27$ ,  
702 VGLUT2-EYFP=  $1.0 \pm 0.03$ ,  $p=0.0209$ ) (Figures 6 A, B; 7 C, D) and a decrease of delta  
703 power both in the dDG LFP (VGLUT2-ChR2=  $0.6 \pm 0.11$ , VGLUT2-EYFP=  $0.9 \pm 0.01$ ,  
704  $p=0.0209$ ) and the EEG (VGLUT2-ChR2=  $0.5 \pm 0.13$ , VGLUT2-EYFP=  $0.9 \pm 0.02$ ,  
705  $p=0.0209$ ) in VGLUT2-ChR2 compared to control VGLUT2-EYFP mice (Figures 5 E, F;  
706 6 A; 7 A, C). This induced waking state was also associated with an increase in gamma

707 power in the dDG LFP (Figures 5 E, G; 6 A, C) and in the EEG (VGLUT2-ChR2=  $1.36 \pm$   
708  $0.16$ , VGLUT2-EYFP  $0.99 \pm 0.03$ ,  $p=0.0433$ ) (Figure 7 B, C, E).

709 In contrast to SWS, light stimulation of SuML axon terminals in the dDG of VGLUT2-  
710 ChR2 mice during PS did not induce significantly more awakening in VGLUT2-ChR2  
711 mice compared to control VGLUT2-EYFP animals ( $p= 0.3865$ ; Figure 5 L).

712 Light activation of SuML axon terminals during PS in VGLUT2-ChR2 induced a  
713 significant increase in theta power compared to VGLUT2-EYFP mice in the dDG LFP  
714 (Figures 5 I, J; 6 A, B; VGLUT2-ChR2=  $1.3 \pm 0.04$ , VGLUT2-EYFP=  $0.9 \pm 0.02$ ,  $p=$   
715  $0.209$ ) but not in the EEG (Figure 7 C, D;  $p= 0.773$ ). The frequency at the theta peak  
716 was also significantly increased in the dDG LFP compared to control EYFP-VGLUT2  
717 animals (VGLUT2-ChR2:  $8.3 \pm 0.13$  Hz, VGLUT2-EYFP:  $7.7 \pm 0.15$  Hz,  $p= 0.0209$ )  
718 (Figure 6 E). In addition, gamma was significantly increased both in the dDG LFP and  
719 the EEG during the stimulation in VGLUT2-ChR2 mice compared to control VGLUT2-  
720 EYFP mice (LFP: VGLUT2-ChR2=  $1.1 \pm 0.02$ , VGLUT2-EYFP=  $1.0 \pm 0.01$ ,  $p= 0.0209$ ;  
721 EEG: VGLUT2-ChR2:  $1.68 \pm 0.05$ , VGLUT2-EYFP:  $0.98 \pm 0.02$ ,  $p= 0.0209$ ; Figures 5 K,  
722 6 A, C; 7 B, C, E).

723  
724 **Effect of optogenetic activation of SumL axon terminals innervating dDG on**  
725 **cFos expression**

726 Mouse brains were processed for immunohistochemical detection of cFos in order to  
727 assess the effect of SuML axon terminal activation on DG cell activity. Whereas only a  
728 few neurons were labeled for cFos in the GCL of the DG in control VGLUT2-EYFP mice  
729 ( $n= 4$ ) (Figure 8 A, B), numerous neurons strongly labeled for cFos were observed in the  
730 granule cell layer of the dDG in VGLUT2-ChR2 mice ( $n= 4$ ) (Figure 8 C, D). Quantitative



731 analysis showed a 241% increase in the number of labeled cFos neurons in the dDG  
732 ipsilateral to the stimulation site ( $270 \pm 33$ ) as compared to control mice (ipsi:  $79 \pm 23$ ;  
733  $p= 0.026$ ; Figure 8 E) whereas no significant difference was observed in the  
734 contralateral dDG (VGLUT2-ChR2:  $178 \pm 21$ ; VGLUT2-EYFP contra:  $90 \pm 33$ ;  $p=0.2$ ;  
735 Figure 8 E).  
736

736 **Discussion**

737 **Neuroanatomical and “in vitro” experiments showing the dual glutamate-GABA**  
738 **feature of the SuML-DG pathway**

739 Our results first establish at the neuroanatomical level that in mice as in rats (Soussi et  
740 al., 2010), all SuM neurons innervating the dDG display a dual GABAergic and  
741 glutamatergic neurotransmitter phenotype. We further demonstrate that these neurons  
742 correspond to a population of SuM cells located just dorsal to the mammillary tract that  
743 likely correspond to grandicellular neurons described in rat within the SuML region  
744 (Paxinos and Watson 1998) or SuMg (Pan and McNaughton 2004). In addition, our EM  
745 data show that SuML terminals form asymmetric (presumed excitatory glutamate)  
746 synapses onto some GCs and symmetric (presumed inhibitory GABA) synapses onto  
747 others as previously described in rat (Boulland et al., 2009; Soussi et al., 2010). We  
748 further found in this study that one axon bouton from a SuML neuron can form an  
749 asymmetric synapse on a GC and a symmetric synapse on another GC. In agreement  
750 with these neuroanatomical results, our *in vitro* electrophysiological experiments show  
751 that optical stimulation of SuM axon terminals innervating the dDG induce co-release of  
752 GABA and glutamate on almost all dentate GCs in line with two recent studies  
753 (Pedersen et al 2017; Hashimotodani et al., 2018). Hashimotodani et al. (2018) further  
754 showed that such co-transmission of GABA and glutamate induce net excitatory effects  
755 on GCs and potentiate GC firing when temporally associated with perforant path inputs.  
756 In line with such hypothesis, after *in vivo* optic stimulation of SuML axon terminals  
757 innervating the dDG in VGLUT2-ChR2 mice, we found that a significant number but not  
758 all GCs neurons below the optic fiber were labeled with cFos. Therefore, these cFos

759 labeled neurons could constitute a population of GCs that are simultaneously activated  
760 by the optic stimulation of SuML axon terminals and perforant path inputs.

761

### 762 **Effect of optogenetic stimulation of SuML-DG fibers on vigilance states**

763 Activation of SuML axon terminals projecting to the DG induces an awakening effect in  
764 mice when performed during SWS but not during PS. It has been shown by Renouard et  
765 al. (2015) that the SuML-DG pathway is active during PS and therefore its stimulation  
766 during this state might not induce WK because the pathway is already engaged and its  
767 overactivation might therefore not to be sufficient to awaken the animal. In contrast,  
768 when the stimulation occurs during SWS, an awakening is induced likely because the  
769 path is normally inactive during this state. It can be proposed that the stimulation of the  
770 DG granule cells by the SuML induces the reactivation of memories and subsequently of  
771 structures involved in the exploration leading to an awakening of the animal during  
772 SWS. It might also be due to the fact that there is no muscle atonia during this state  
773 compared to PS. In line with such hypothesis, stimulation during WK induces increased  
774 motor and exploratory activity. Such result is in line with the literature since an increase  
775 in exploratory activity was reported when stimulating with blue light dDG neurons  
776 expressing ChR2 (Kheirbek et al., 2013).

777

### 778 **Optogenetic stimulation of SuML-DG fibers increases gamma and theta**

779 Our study further demonstrates that activation of SuML axon terminals innervating the  
780 DG during PS increases theta power and frequency as well as gamma power in the DG  
781 LFP and to a minor extent in the EEG. Activation of the SuML fibers during WK also  
782 induces an increase of gamma power in the DG LFP and EEG associated with an

783 increased locomotion. During SWS, the activation of the SuML-dDG pathway induced  
784 awakening and a switch from delta to theta activity and an increase in gamma power  
785 both in DG LFP and EEG.

786 It has been previously shown that the SuM can exert significant modulatory control of  
787 the theta rhythm (Vertes and Kocsis, 1997). A large percentage of SuM neurons  
788 discharge rhythmically, in phase with theta (Kirk and McNaughton, 1991, Kocsis and  
789 Vertes, 1994) and this activity is independent of that occurring in the hippocampus.  
790 Indeed, neurons in the SuM continue to fire bursts in the theta range frequency after  
791 lesion or pharmacological inactivation of the medial septum (Kirk and McNaughton,  
792 1991) known to abolish theta rhythmic activity in the hippocampus. Further, electrical  
793 stimulation or carbachol injections in the SuM synchronously drive theta phase-locked  
794 cells in both septum (Bland et al., 1994) and hippocampus (Colom et al., 1987). In  
795 addition, the SuM controls the frequency and amplitude of theta (Kirk and McNaughton,  
796 1993). These results indicated that the SuM plays a role in theta occurrence but  
797 experiments were performed in anesthetized animals and did not specifically study the  
798 SuML-DG pathway like in the present study. Indeed, SuM neurons also project directly  
799 to the medial septum (Vertes and McKenna, 2000) and can influence theta through the  
800 latter structure as well.

801 Our results also show that the frequency at the peak of theta is higher during PS than in  
802 WK in basal conditions. Further, we found out that optical stimulation of SuML-DG fibers  
803 during PS induced a similar increase of the frequency at the peak of theta. Besides,  
804 lesion of the SuM induced a decreased of theta power specifically during PS (Renouard  
805 et al., 2015). On the other hand, lesion of all neurons or specific inactivation of the  
806 GABAergic neurons of the medial septum strongly decreases theta during PS and WK

807 (Mitchell et al., 1982, Green and Arduini, 1954, Boyce et al., 2016). Our data also show  
808 that stimulation of the SuML-DG fibers induces an increase in gamma power in the dDG  
809 and also in the EEG both during PS and WK. Interestingly, Montgomery et al. (2008)  
810 found by coherence analysis that dentate/CA3 theta and gamma power and synchrony  
811 were significantly higher during PS compared with active WK and that, in contrast,  
812 gamma power in CA1 and CA3-CA1 gamma coherence showed significant decreases  
813 during PS. These and our results strongly suggest that the medial septum GABAergic  
814 neurons induces theta both during WK and PS whereas the increase of theta and  
815 gamma power and theta frequency occurring in the DG during PS compared to WK is  
816 induced by the projection from the SumL.

817

### 818 **Functional role of the SumL-DG pathway**

819 It has been previously shown that GCs of the DG are instrumental for spatial  
820 discrimination (McHugh et al., 2007). In particular, it has been shown that small  
821 populations of GCs (2-4%) representing memory engrams are specifically activated  
822 when the animals are exposed to a specific context. These cells are reactivated each  
823 time the animal is re-exposed to the same context (Schmidt et al., 2012). Optogenetic  
824 activation in a different context of a DG engram activated during contextual fear  
825 conditioning induces freezing (Liu et al., 2012). Conversely, inactivation during  
826 contextual fear memory recall of the DG GCs activated during encoding decreases  
827 freezing (Denny et al., 2014). These results indicate that activation of memory engrams  
828 composed of DG GCs cells is necessary for spatial learning. Interestingly, in these  
829 studies, the mean number of neurons labeled with cFos or Arc in one section (35  $\mu$ m) of  
830 the DG after contextual fear conditioning was in the 30-60 range. In the present study,

831 during stimulation of the SuML fibers in the DG, a mean of 67 DG cells were expressing  
832 cFos in the DG per section (40  $\mu$ m). Finally, Renouard et al. (2015) counted a mean of  
833 68 Arc- and 66 cFos- labeled neurons in one DG section after PS hypersomnia in rats.  
834 Therefore, approximatively the same number of DG GCs cells is activated during  
835 encoding of a contextual fear memory, stimulation of the SuML fibers in the DG and PS  
836 hypersomnia. First, the fact that a similar number of cells are activated when stimulating  
837 SuML terminals as during PS hypersomnia suggests that the activation seen during PS  
838 is likely due to activation of the SuML-DG pathway. Second, the fact that a similar  
839 number of cells are activated during a memory task as during PS hypersomnia and  
840 stimulation of the SuML fibers suggest that memory engrams could be activated in these  
841 two conditions. Therefore, the induction of an active behavior when the stimulation is  
842 made during WK could be due to the activation of memory engrams. Since only a limited  
843 number of GCs cells are activated during PS and SuML terminals stimulation despite the  
844 fact that a large number of GCs neurons seems to be innervated by SuML axon  
845 terminals, it also suggests that activation of these cells is due to a conjunction of the  
846 SuML input with another excitatory input. It can be proposed that the medial entorhinal  
847 input is involved since it is the main excitatory afferent to the DG involved in its activation  
848 during memory encoding (Sasaki et al., 2015). Such hypothesis remains to be tested  
849 using optogenetic manipulation of the activated neurons during PS.

850

851

851 **References**

852 Billwiller F, Renouard L, Clement O, Fort P, Luppi PH (2017) Differential origin of the  
853 activation of dorsal and ventral dentate gyrus granule cells during paradoxical (REM)  
854 sleep in the rat. *Brain Struct Funct* 222:1495-1507.

855 Bland BH, Oddie SD, Colom LV, Vertes RP (1994) Extrinsic modulation of medial septal  
856 cell discharges by the ascending brainstem hippocampal synchronizing pathway.  
857 *Hippocampus* 4:649-60.

858 Bolte S, Cordelières FP (2006) A guided tour into subcellular colocalization analysis in  
859 light microscopy. *J Microsc* 224:213-232.

860 Borhegyi Z, Leranth C (1997) Distinct substance P- and calretinin-containing projections  
861 from the supramammillary area to the hippocampus in rats; a species difference  
862 between rats and monkeys. *Exp Brain Res* 115:369-374.

863 Boulland JL, Jenstad M, Boekel AJ, Wouterlood FG, Edwards RH, Storm-Mathisen J,  
864 Chaudhry FA (2009) Vesicular Glutamate and GABA Transporters Sort to Distinct Sets  
865 of Vesicles in a Population of Presynaptic Terminals. *Cereb Cortex* 19:241-248.

866 Boyce R, Glasgow SD, Williams S, Adamantidis A (2016) Causal evidence for the role of  
867 REM sleep theta rhythm in contextual memory consolidation. *Science* 352:812-816.

868 Bras H, Gaytán SP, Portalier P, Zanella S, Pásaro R, Coulon P, Hilaire G (2008)  
869 Prenatal activation of 5-HT 2A receptor induces expression of 5-HT 1B receptor in  
870 phrenic motoneurons and alters the organization of their premotor network in newborn  
871 mice. *Eur J Neurosci* 28:1097-1107.

- 872 Colom LV, Ford RD, Bland BH (1987) Hippocampal formation neurons code the level of  
873 activation of the cholinergic septohippocampal pathway. *Brain Res* 410:12-20.
- 874 Coulon P, Bras H, Vinay L (2011) Characterization of last-order premotor interneurons  
875 by transneuronal tracing with rabies virus in the neonatal mouse spinal cord. *J Comp*  
876 *Neurol* 519:3470-3487.
- 877 Denny CA, Kheirbek MA, Alba EL, Tanaka KF, Brachman RA, Laughman KB, Tomm  
878 NK, Turi GF, Losonczy A, Hen R (2014) Hippocampal memory traces are differentially  
879 modulated by experience, time, and adult neurogenesis. *Neuron* 83: 189-201.
- 880 Gonzalo-Ruiz A, Alonso A, Sanz JM, Llinás RR (1992) Afferent projections to the  
881 mammillary complex of the rat, with special reference to those from surrounding  
882 hypothalamic regions. *J Comp Neurol* 321:277-299.
- 883 Green JD, Arduini AA (1954) Hippocampal electrical activity in arousal. *J Neurophysiol*  
884 17:533-57.
- 885 Haglund L, Swanson LW, Köhler C (1984) The projection of the supramammillary  
886 nucleus to the hippocampal formation: An immunohistochemical and anterograde  
887 transport study with the lectin PHA-L in the rat. *J Comp Neurol* 229:171-185.
- 888 Hashimotodani Y, Karube F, Yanagawa Y, Fujiyama F, Kano M (2018)  
889 Supramammillary Nucleus Afferents to the Dentate Gyrus Co-release Glutamate and  
890 GABA and Potentiate Granule Cell Output. *Cell Rep* 25:2704-2715
- 891 Kheirbek MA, Drew LJ, Burghardt NS, Costantini DO, Tannenholz L, Ahmari SE, Zeng  
892 H, Fenton AA, Hen R (2013) Differential control of learning and anxiety along the  
893 dorsoventral axis of the dentate gyrus. *Neuron* 77:955-968.



- 894 Kirk IJ, McNaughton N (1991) Supramammillary cell firing and hippocampal rhythmical  
895 slow activity. *Neuroreport* 2:723-5.
- 896 Kirk IJ, McNaughton N (1993) Mapping the differential effects of procaine on frequency  
897 and amplitude of reticularly elicited hippocampal rhythmical slow activity. *Hippocampus*  
898 3:517-25.
- 899 Kocsis B, Kaminski M (2006) Dynamic changes in the direction of the theta rhythmic  
900 drive between supramammillary nucleus and the septohippocampal system.  
901 *Hippocampus* 16:531-540.
- 902 Kocsis B, Vertes RP (1994) Characterization of neurons of the supramammillary nucleus  
903 and mammillary body that discharge rhythmically with the hippocampal theta rhythm in  
904 the rat. *J Neurosci* 14:7040-7052.
- 905 Kocsis K, Kiss J, Csáki A, Halász B (2003) Location of putative glutamatergic neurons  
906 projecting to the medial preoptic area of the rat hypothalamus. *Brain Res Bull* 61:459-  
907 468.
- 908 Leranath C, Kiss J (1996) A population of supramammillary area calretinin neurons  
909 terminating on medial septal area cholinergic and lateral septal area calbindin-containing  
910 cells are aspartate/glutamatergic. *J Neurosci* 16:7699-7710.
- 911 Liu X, Ramirez S, Pang PT, Puryear CB, Govindarajan A, Deisseroth K, Tonegawa S  
912 (2012) Optogenetic stimulation of a hippocampal engram activates fear memory recall.  
913 *Nature* 484:381-385.
- 914 Maglóczy Z, Acsády L, Freund TF (1994) Principal cells are the postsynaptic targets of  
915 supramammillary afferents in the hippocampus of the rat. *Hippocampus* 4:322-334.

916 Maquet P, Laureys S, Peigneux P, Fuchs S, Petiau C, Phillips C, Aerts J, Del Fiore G,  
917 Degueldre C, Meulemans T, Luxen A, Franck G, Van Der Linden M, Smith C,  
918 Cleeremans A (2000) Experience-dependent changes in cerebral activation during  
919 human REM sleep. *Nat Neurosci* 3:831-836.

920 McHugh TJ, Jones MW, Quinn JJ, Balthasar N, Coppari R, Elmquist JK, Lowell BB,  
921 Fanselow MS, Wilson MA, Tonegawa S (2007) Dentate gyrus NMDA receptors mediate  
922 rapid pattern separation in the hippocampal network. *Science* 317:94-99.

923 Mitchell SJ, Rawlins JN, Steward O, Olton DS.(1982) Medial septal area lesions disrupt  
924 theta rhythm and cholinergic staining in medial entorhinal cortex and produce impaired  
925 radial arm maze behavior in rats. *J Neurosci* 2:292-302

926 Montgomery SM, Sirota A, Buzsáki G (2008) Theta and gamma coordination of  
927 hippocampal networks during waking and rapid eye movement sleep. *J Neurosci*  
928 28:6731-41.

929 Nitsch R, Leranth C (1996) GABAergic neurons in the rat dentate gyrus are innervated  
930 by subcortical calretinin-containing afferents. *J Comp Neurol* 364:425-438.

931 Pan WX, McNaughton N (2002) The role of the medial supramammillary nucleus in the  
932 control of hippocampal theta activity and behaviour in rats. *Eur J Neurosci* 16:1797-  
933 1809.

934 Pan WX, McNaughton N (2004) The supramammillary area: its organization, functions  
935 and relationship to the hippocampus. *Prog Neurobiol* 74:127-166.

- 936 Pasquier DA, Reinoso-Suarez F (1976) Direct projections from hypothalamus to  
937 hippocampus in the rat demonstrated by retrograde transport of horseradish peroxidase.  
938 Brain Res 108:165-169.
- 939 Pasquier DA, Reinoso-Suarez F (1978) The topographic organization of hypothalamic  
940 and brain stem projections to the hippocampus. Brain Res Bull 3:373-389.
- 941 Paxinos G, Franklin KB (2005) The Mouse Brain in Stereotaxic Coordinates - 5th  
942 Edition. Academic Press, San Diego.
- 943 Paxinos G, Watson, C (1998) The Rat Brain in Stereotaxic Coordinates, Academic  
944 Press, Sydney.
- 945 Pedersen NP, Ferrari L, Venner A, Wang JL, Abbott SBG, Vujovic N, Arrigoni E, Saper  
946 CB, Fuller PM (2017) Supramammillary glutamate neurons are a key node of the  
947 arousal system. Nat Commun 8:1405.
- 948 Persson S, Boulland JL, Aspling M, Larsson M, Fremeau RT Jr, Edwards RH, Storm-  
949 Mathisen J, Chaudhry FA, Broman J (2006) Distribution of vesicular glutamate  
950 transporters 1 and 2 in the rat spinal cord, with a note on the spinocervical tract. J Comp  
951 Neurol 497:683-701.
- 952 Raux H, Iseni F, Lafay F, Blondel D (1997) Mapping of monoclonal antibody epitopes of  
953 the rabies virus P protein. J Gen Virol 78:119-124.
- 954 Renouard L, Billwiller F, Ogawa K, Clément O, Camargo N, Abdelkarim M, Gay N,  
955 Scoté-Blachon C, Touré R, Libourel PA, Ravassard P, Salvert D, Peyron C, Claustrat B,  
956 Léger L, Salin P, Malleret G, Fort P, Luppi PH (2015) The supramammillary nucleus and  
957 the claustrum activate the cortex during REM sleep Sci Adv 1: e1400177.

- 958 Richmond MA, Yee BK, Pouzet B, Veenman L, Rawlins JN, Feldon J, Bannerman DM  
959 (1999) Dissociating context and space within the hippocampus: effects of complete,  
960 dorsal, and ventral excitotoxic hippocampal lesions on conditioned freezing and spatial  
961 learning. *Behav Neurosci* 113:1189-1203.
- 962 Santín LJ, Aguirre JA, Rubio S, Begega A, Miranda R, Arias JL (2003) c-Fos expression  
963 in supramammillary and medial mammillary nuclei following spatial reference and  
964 working memory tasks. *Physiol Behav* 78:733-739.
- 965 Saper CB (1985) Organization of cerebral cortical afferent systems in the rat. II.  
966 Hypothalamocortical projections. *J Comp Neurol* 237:21-46.
- 967 Sapin E, Lapray D, Bérod A, Goutagny R, Léger L, Ravassard P, Clément O, Hanriot L,  
968 Fort P, Luppi PH (2009) Localization of the brainstem GABAergic neurons controlling  
969 paradoxical (REM) sleep. *PLoS One* 4:e4272
- 970 Sasaki T, Leutgeb S, Leutgeb JK (2015) Spatial and memory circuits in the medial  
971 entorhinal cortex. *Curr Opin Neurobiol* 32:16-23
- 972 Schmidt B, Marrone DF, Markus EJ (2012) Disambiguating the similar: the dentate  
973 gyrus and pattern separation. *Behav Brain Res* 226:56-65.
- 974 Segal M, Landis S (1974) Afferents to the hippocampus of the rat studied with the  
975 method of retrograde transport of horseradish peroxidase. *Brain Res* 78:1-15.
- 976 Shahidi S, Motamedi F, Naghdi N (2004) Effect of reversible inactivation of the  
977 supramammillary nucleus on spatial learning and memory in rats. *Brain Res* 1026: 267-  
978 274.

- 979 Soussi R, Boulland JL, Bassot E, Bras H, Coulon P, Chaudhry FA, Storm-Mathisen J,  
980 Ferhat L, Esclapez M (2015) Reorganization of supramammillary–hippocampal  
981 pathways in the rat pilocarpine model of temporal lobe epilepsy: evidence for axon  
982 terminal sprouting. *Brain Struct Funct* 220: 2449-2468.
- 983 Soussi R, Zhang N, Tahtakran S, Houser CR, Esclapez M (2010) Heterogeneity of the  
984 supramammillary-hippocampal pathways: evidence for a unique GABAergic  
985 neurotransmitter phenotype and regional differences: GABAergic and glutamatergic  
986 supramammillary-hippocampal pathways. *Eur J Neurosci* 32:771-785.
- 987 Swanson LW (1982) The projections of the ventral tegmental area and adjacent regions:  
988 a combined fluorescent retrograde tracer and immunofluorescence study in the rat.  
989 *Brain Res Bull* 9:321-353.
- 990 Swanson LW (1998) *Brain Maps: Structure of the Rat Brain*. Elsevier, Amsterdam
- 991 Ugolini G (2010) Advances in viral transneuronal tracing. *J Neurosci Methods* 194:2-20.
- 992 Vertes RP (1992) PHA-L analysis of projections from the supramammillary nucleus in  
993 the rat. *J Comp Neurol* 326:595-622.
- 994 Vertes RP (2015) Major diencephalic inputs to the hippocampus. *Prog Brain Res*  
995 121:144.
- 996 Vertes RP, Kocsis B (1997) Brainstem-diencephalo-septohippocampal systems  
997 controlling the theta rhythm of the hippocampus. *Neuroscience* 81:893-926.
- 998 Vertes RP, McKenna JT (2000) Collateral projections from the supramammillary nucleus  
999 to the medial septum and hippocampus. *Synapse* 38:281-293.

- 1000 Wyss JM, Swanson LW, Cowan WM (1979) A study of subcortical afferents to the  
1001 hippocampal formation in the rat. *Neuroscience* 4:463-476.
- 1002 Zhang N, Houser CR (1999) Ultrastructural localization of dynorphin in the dentate gyrus  
1003 in human temporal lobe epilepsy: a study of reorganized mossy fiber synapses. *J Comp*  
1004 *Neurol* 405:472-490.
- 1005
- 1006

1006 **Figures**

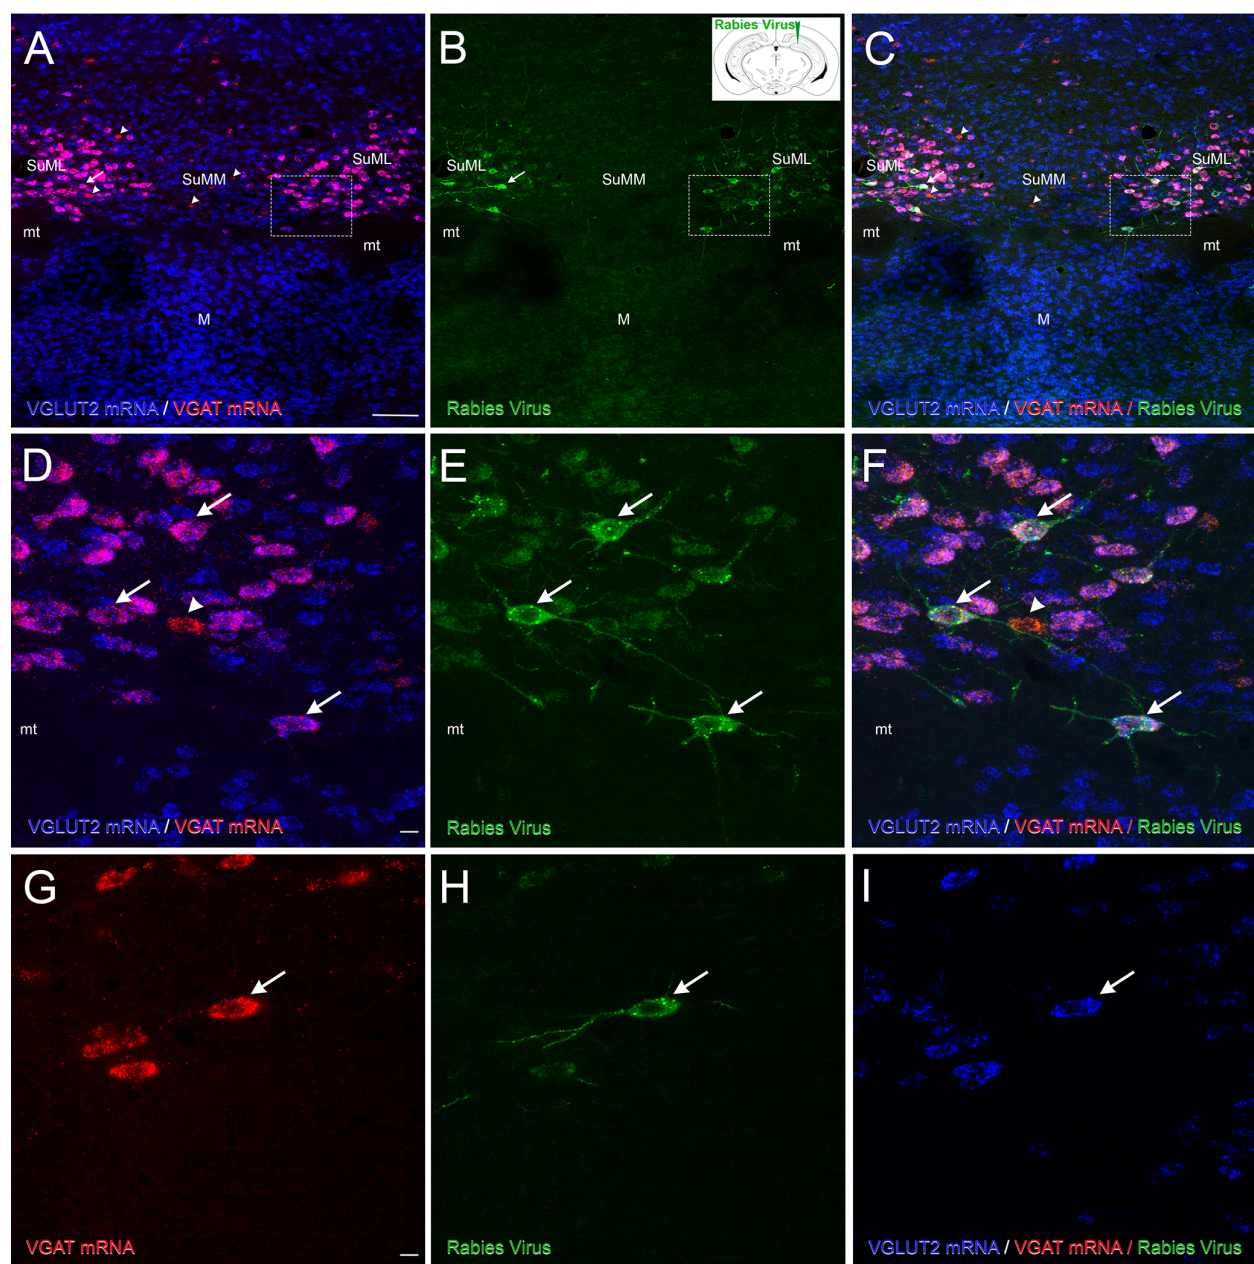

1007  
1008 **Figure 1: Neurochemical features of SuML neurons innervating the dorsal dentate**  
1009 **gyrus (DG) characterized by simultaneous labeling for the rabies virus (RV)**  
1010 **retrograde tracer (green), VGAT mRNA (red) and VGLUT2 mRNA (blue) in a**  
1011 **coronal section.**

1012 (A-I) All confocal images were obtained from sequential acquisition of separate  
1013 wavelength channels, corresponding to the different fluorophores used for the triple  
1014 labeling, from a single optical slice. This optical slice was acquired in the  
1015 supramammillary region of the hypothalamus from a coronal section of a VGLUT2-cre  
1016 mouse that received an injection of RV in supragranular layer of the DG (B, insert). A)  
1017 Image obtained from the merge of the two confocal images corresponding respectively  
1018 to the labeling of VGLUT2 (blue) and VGAT (red) mRNAs. Many neurons expressing  
1019 both VGLUT2 and VGAT mRNAs (arrow) were observed in the lateral region of the  
1020 supramammillary nucleus (SuML). They were located almost exclusively above and  
1021 around the mammillary tract (mt). Neurons expressing VGLUT2 mRNA only (blue) were  
1022 observed mainly in the most medial part of the SuM (SuMM) and were numerous in the  
1023 mammillary nucleus (M). Few neurons containing VGAT mRNA only (red, arrowheads)  
1024 were distributed in the SuML and SUMM. B) Confocal image corresponding to the  
1025 immunohistochemical labeling of the RV (green) showing that all RV containing neurons  
1026 in the SuM were located in the region of the SuML surrounded the mt. C) Merge of A-B.  
1027 (D-F) Higher magnification of region outlined in A-C showing that all these SuML  
1028 neurons projecting to the DG, labeled for the RV (E, arrows), co-expressed VGLUT2 and  
1029 VGAT mRNAs (D, F, arrows). (G-I) RV labeled neuron (H, arrow) co-expressed VGAT  
1030 mRNA (G, arrow) and VGLUT2 mRNA (I, arrow) Scale bars: A-C, 100 $\mu$ m; D-I, 10 $\mu$ m.  
1031



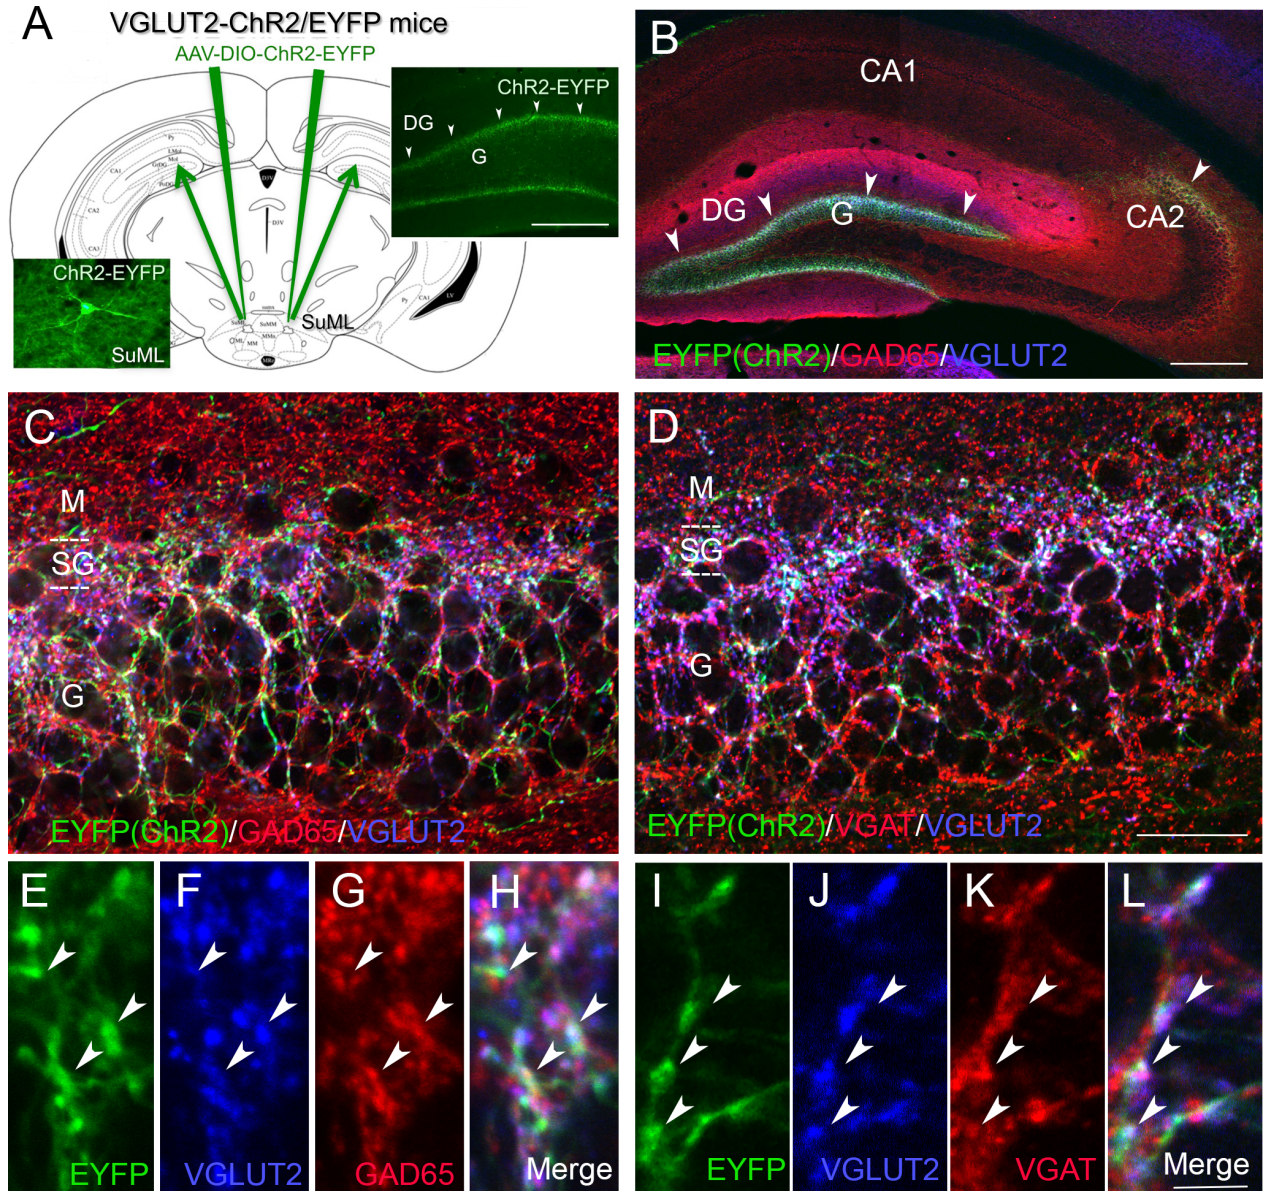

1032  
1033 **Figure 2: Neurochemical features of axon terminals from SuML neurons**  
1034 **innervating the dorsal DG characterized by simultaneous immunohistochemical**  
1035 **labeling for the AAV-EYFP anterograde tracer (green), GAD65 or VGAT (red) and**  
1036 **VGLUT2 (blue) in coronal sections.**

1037 (A) Diagram illustrating the bilateral injections of the viral vector AAV-DIO-ChR2-EYFP  
1038 within the lateral region of the SuM. Images from a coronal section showing endogenous  
1039 fluorescence of EYFP observed in the cell body and proximal dendrites of a transfected

1040 neuron located within the SuML as well as fibers and axon terminals within the  
1041 supragranular (arrowheads) and granular layer (G) of the DG. (B) Image obtained from a  
1042 single optical slice showing labeling for EYFP (green), GAD65 (red) and VGLUT2 (blue)  
1043 in the hippocampus. Fibers labeled with the anterograde tracer AAV-DIO-ChR2-EYFP  
1044 injected within the SUM as illustrate in (A) were exclusively located in the supragranular  
1045 (arrowheads) and granule cell (G) layers as well as the CA2 region of the hippocampus.  
1046 (C, D) Images corresponding to a maximum intensity z-projection of a stack of 8 optical  
1047 slices spaced at 370 nm, showing labeling for EYFP (green), VGLUT2 (blue) and  
1048 GAD65 (C, red) or VGAT (D, red) in the dorsal DG. Axon terminals and fibers, from  
1049 neurons in the SuML, labeled for the EYFP anterograde tracer (green) were located  
1050 mainly in the supragranular layer but also in the granule cell layer. Numerous GAD65-  
1051 (C) or VGAT- (D) containing terminals were present in the molecular layer (M) and  
1052 granule cell layer (G) of the dorsal DG. VGLUT2-containing terminals were mainly  
1053 located in the supragranular layer (SG) but were also observed in G. (E–L) Images of  
1054 the three different fluorophores used for the triple labeling, obtained by sequential  
1055 acquisition of separate wavelength channels from a single optical slice, in the SG of the  
1056 DG demonstrated that many if not all axon terminals labeled for EYFP (B, I, green,  
1057 arrowheads) contained GAD65 (G, red arrowheads), VGAT (K, red, arrowheads) but  
1058 also VGLUT2 (F, J blue, arrowheads). (H) Merge of E-G. (L) Merge of I-K. Scale bars: A-  
1059 B, 200 $\mu$ m; C-D, 25 $\mu$ m and E-L, 3 $\mu$ m.

1060

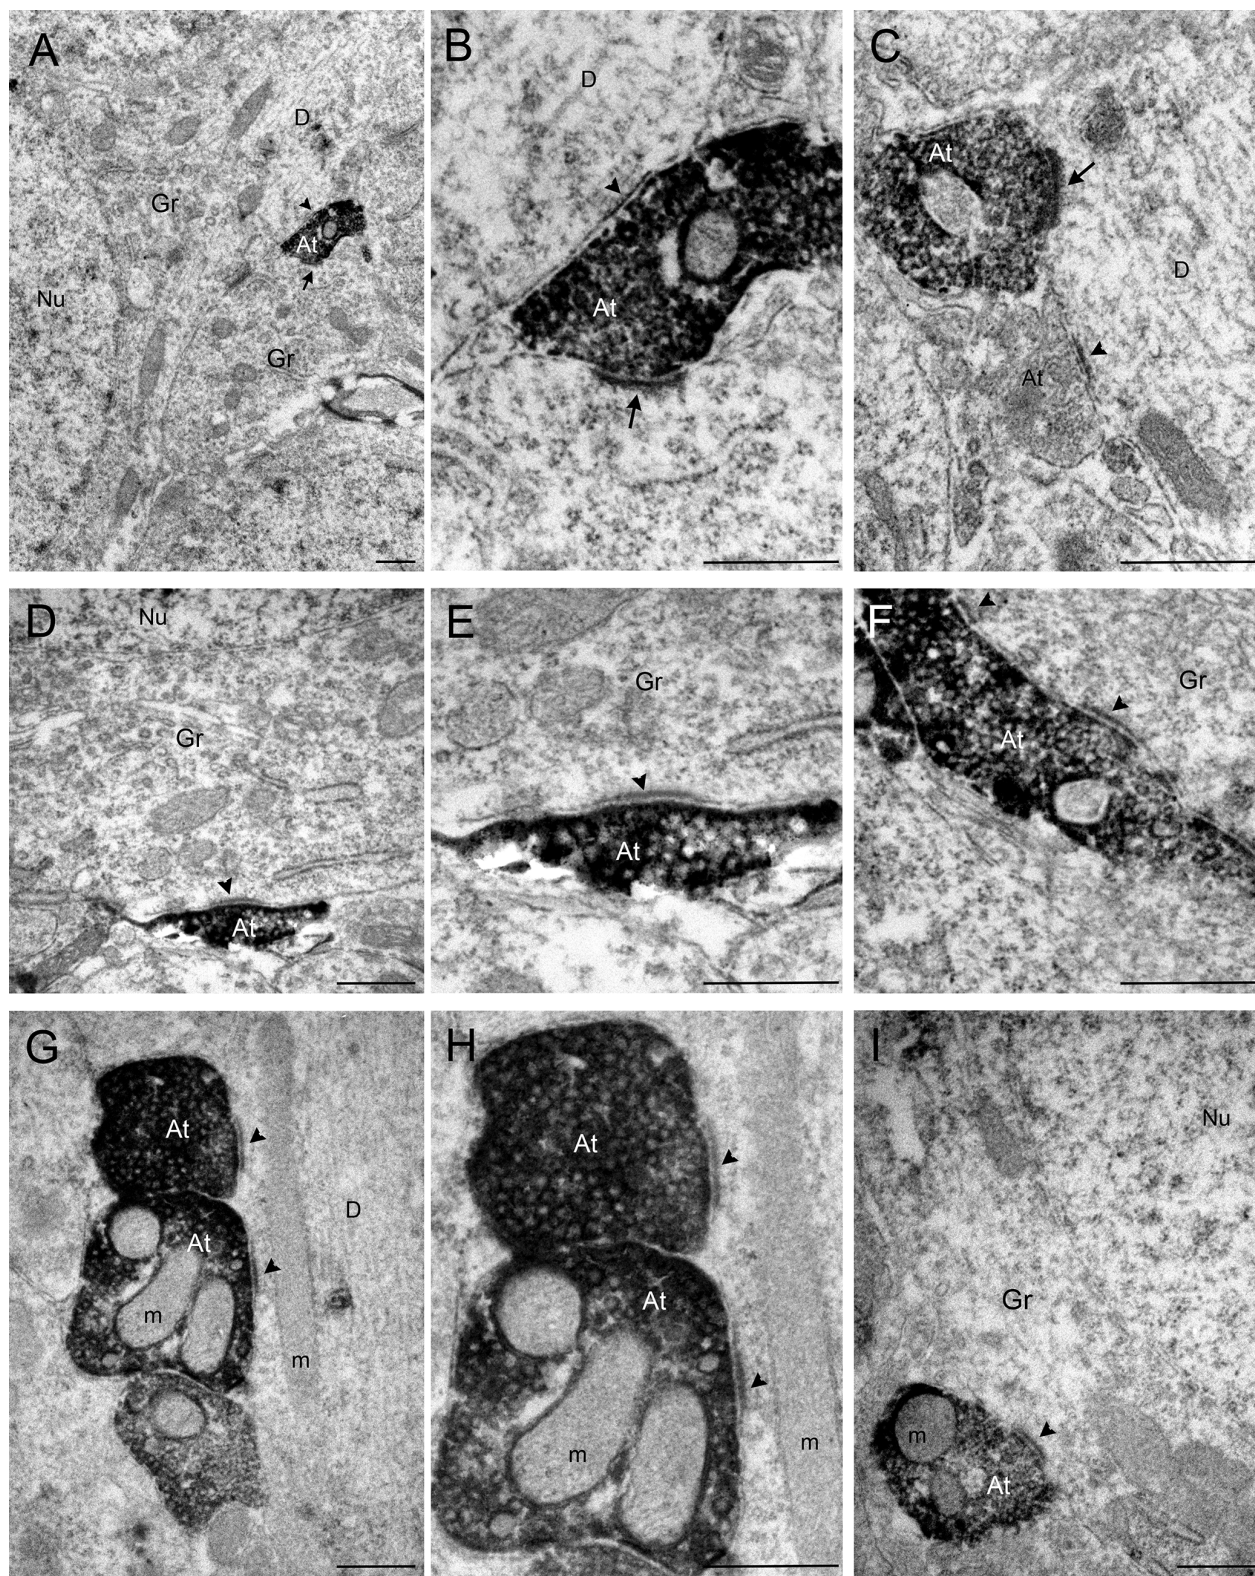

1061

1062 **Figure 3: Pre-embedding immunolabeling for EYFP anterograde tracer in ultrathin**

1063 **coronal sections of the dorsal DG.**

1064 (A–I) In the dorsal DG, numerous axon terminals were labeled for EYFP, revealed by  
1065 electron-dense peroxidase 3.3'-diaminobenzidine tetrahydrochloride product. (A) A  
1066 labeled axon terminal (At) making two synaptic contacts (arrow and arrowhead) on  
1067 unlabeled somata of 2 presumed granule cells (Gr). (B) Higher magnification of the At  
1068 illustrated in (A) showing that these two synaptic contacts were different: one displayed  
1069 a relatively thin post-synaptic densities (arrowhead) characteristic of symmetric  
1070 synapses on the soma of one Gr; the other one displayed a thick post-synaptic densities  
1071 (arrow) characteristic of asymmetric synapses on the soma of another Gr. (C) Labeled  
1072 axon terminals established synaptic contacts displaying a thick synaptic densities on  
1073 unlabeled dendritic processes (D) that differed from the synaptic contact formed by the  
1074 unlabeled At (arrow). The synaptic contacts illustrated in D-I displayed relatively thin  
1075 post-synaptic densities (arrowheads) on the soma (D-F, I) or dendrites (G, H) of  
1076 unlabeled Gr. m, mitochondria; Nu, nucleus. Scale bar: A-I, 0.5  $\mu$ m.  
1077

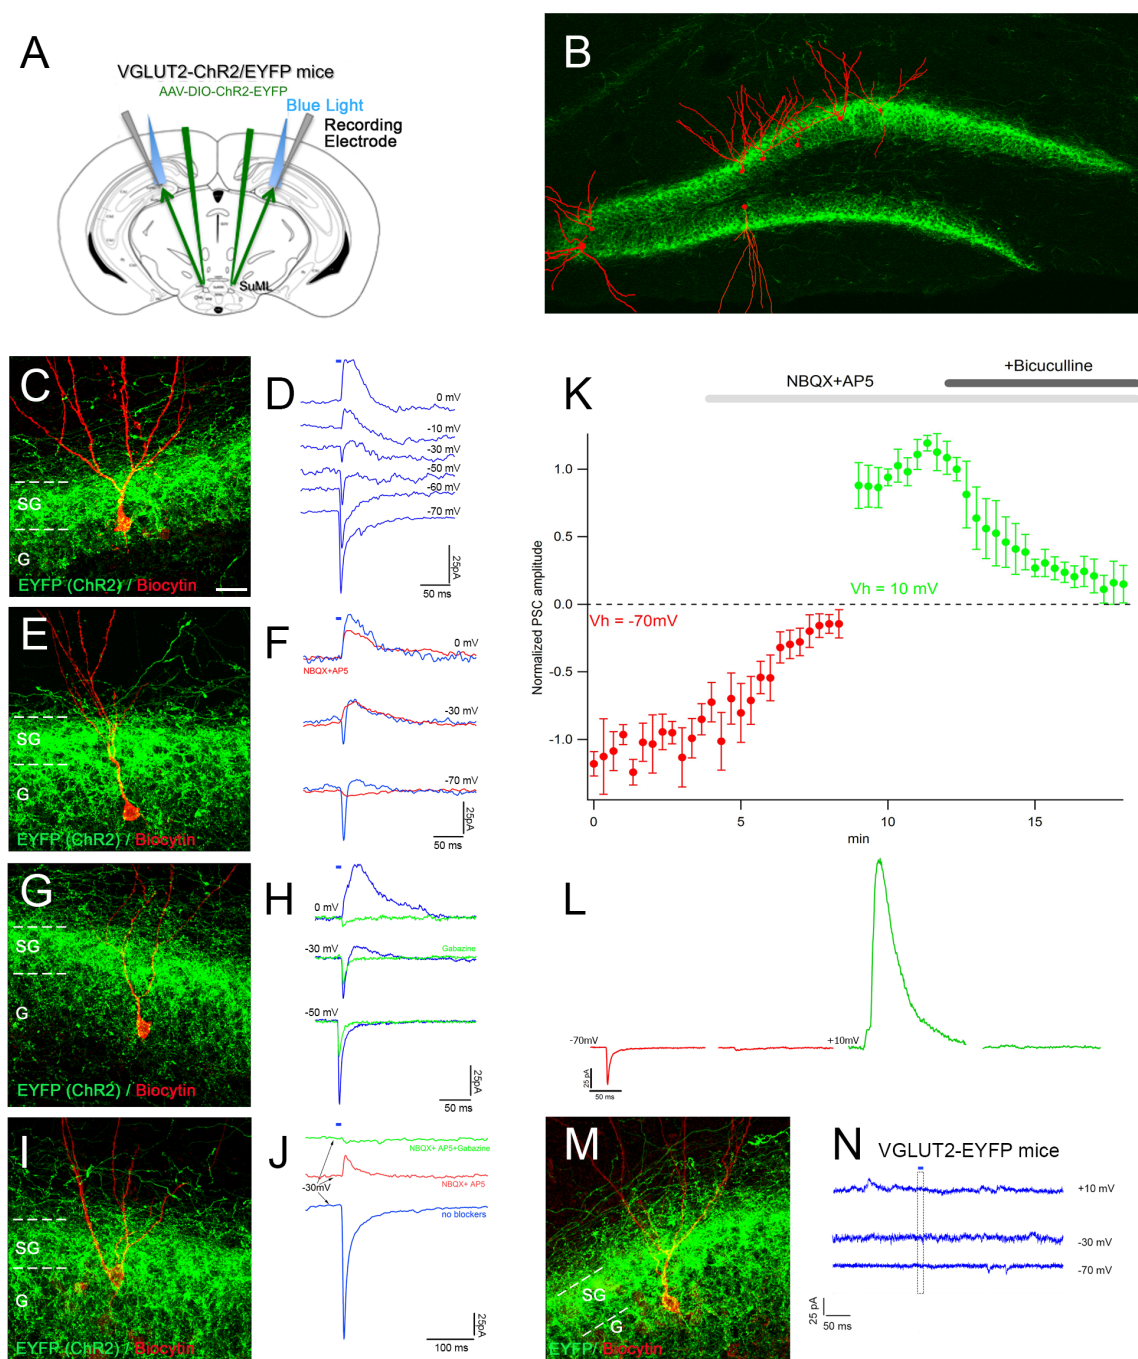

1078  
 1079 **Figure 4: Selective stimulation of axonal terminals from SuML neurons**  
 1080 **innervating the dorsal DG, performed in hippocampal slices of VGLUT2-ChR2-**  
 1081 **EYFP mice, induced co-release of GABA and glutamate on DG granule cells.**

1082 (A) Diagram illustrating the site of the bilateral injections of AAV-DIO-ChR2-EYFP in  
1083 VGLUT2-cre mice, of light stimulations and of the recorded patch clamp electrode in the  
1084 DG of the VGLUT2-ChR2-EYFP mice. (B) Montage illustrating the position within the  
1085 dentate granule cell layer of the biocytin-filled cells reconstructed after patch clamp  
1086 recordings and EYFP-labeled terminals originating from SuML neurons.

1087 (D, F, H, J, N) Examples of light induced PSCs recorded in DG cells illustrated in (C, E,  
1088 G, I, M). (D) Light induced post-synaptic currents (PSCs) recorded at different holding  
1089 potentials in DG neuron; short black bar above the upper trace shows the time moment  
1090 and duration of light stimulus. Note at -70 mV to -50 mV holdings the PSCs had  
1091 negative-going direction (inward) currents. They were positive-going (outward) at -10 mV  
1092 and 0 mV but displayed both negative- and positive-going phases when the neuron  
1093 membrane was clamped at -30 mV. This suggests that light stimulation induces two  
1094 types of postsynaptic currents. Indeed, the application of glutamate receptor blockers  
1095 NBQX and AP5 (F, red traces) inhibited inward (F, negative going) component of PSCs  
1096 recorded at negative holding potentials ( $V_h$ ), but had only small effect on outward  
1097 component (positive going) recorded at positive  $V_h$ . Inversely, the outward component of  
1098 light induced PSCs was sensitive to GABA A receptor inhibitor gabazine (H, green vs  
1099 blue traces). This suggests that these PSCs are generated by simultaneous activation of  
1100 glutamate and GABA post-synaptic receptors. Interestingly at -50 mV holding, PSC was  
1101 larger without gabazine (H, blue versus green trace), probably because GABA-mediated  
1102 current hyperpolarizes the membrane potential increasing thus the driving force for the  
1103 glutamatergic current. In voltage-clamp condition such an interaction is possible if the  
1104 pool of postsynaptic GABA Rs is close to the postsynaptic Glu R pool. (K, L) Effect of  
1105 glutamate and GABA A receptors blockers on the peak amplitude of light pulse evoked

1106 PSC recorded at -70 mV (red circles) and 10 mV (green circles) holding potentials. For  
1107 each  $V_h$  the peak amplitudes of first 10 PSCs were averaged and used then as a  
1108 normalization factor for all peak amplitude recorded at given potential. Each point and  
1109 error bars corresponds the mean  $\pm$  SD of PSC normalized amplitude recorded in 5 DG  
1110 neurons. In regular ACSF the repetitive light pulses (5 ms, 0.05 Hz) evoked PCS of  
1111 relatively stable amplitude ( $1.00 \pm 0.26$ , L left hand side red trace-an example of  
1112 averaged response of one neuron). The application of glutamate receptor blockers (10  
1113  $\mu$ M NBQX + 40  $\mu$ M D-AP5) reduced the peak amplitude by 84% ( $0.16 \pm 0.15$ ,  $p < 0.01$ ,  
1114  $n = 5$ , paired Wilcoxon test). The remaining response was seen in 4 from 5 neurons and  
1115 is probably due to GABA A mediated current because at -70 mV the driving force for  
1116 chloride driven currents is close to but not zero (L, red trance in the middle) therefore in  
1117 case of GABA massive release some inward current is still possible. Indeed a switch to  
1118  $V_h = 10$  mV revealed a huge PSC response to light stimulation (L, green trace in the  
1119 middle) which amplitude was stable ( $1.00 \pm 0.20$ ) but progressively reduced to 12%  
1120 ( $0.12 \pm 0.16$ ,  $p < 0.01$ ,  $n = 5$ , paired Wilcoxon test) by the addition of 10  $\mu$ M bicuculline to  
1121 the ACSF already containing GluR blockers (L, green trace at left). In 3 from 5 neurons,  
1122 6 min lasting bicuculline application completely abolished response to light pulses. In  
1123 two neurons the remaining current is probably due to the competitive character of  
1124 bicuculline induced inhibition i.e in case of high GABA release 10  $\mu$ M of bicuculline may  
1125 be not sufficient to all receptors inhibition. (M, N) The identical light stimulation (5 ms,  
1126 10%, 50% 90% max power LED) of fibers and axon terminals expressing EYFP on  
1127 slices of control VGLUT2-EYFP mice ( $n = 3$ ) did not evoke any response in the recorded  
1128 granule cells ( $n = 5$ ) confirming that ChR2 activation is required to obtain the PSCs.  
1129 Scale Bar: C, E, G, I, M, 20 $\mu$ m.

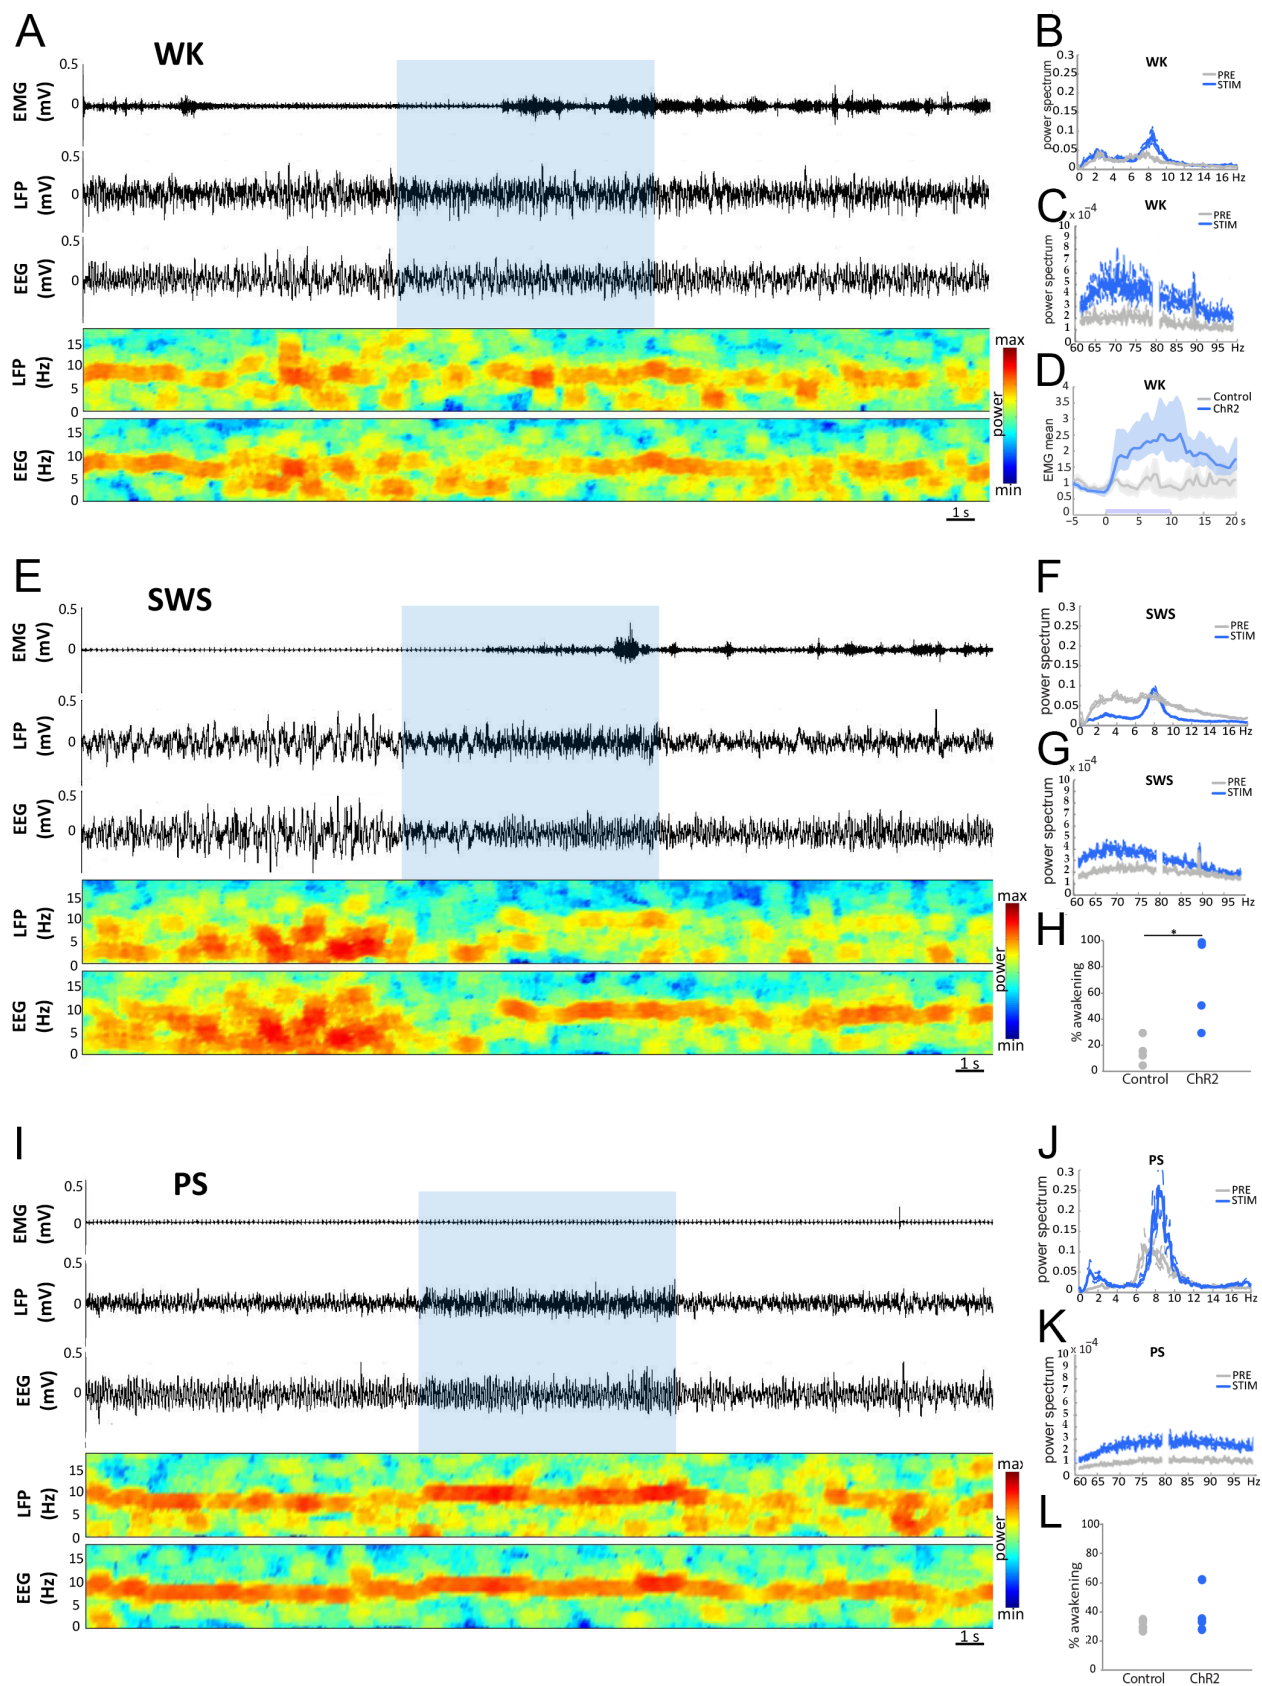

1130



1131 **Figure 5: Effects of light stimulation of axonal terminals from SuML neurons**  
1132 **innervating the dorsal DG on DG LFP, EEG recordings and behavior of VGLUT2-**  
1133 **Chr2-EYFP mice during WK, SWS and PS.**

1134 (A, E, I) Examples of raw recording for EMG, LFP recorded in the DG and parietal  
1135 cortex EEG as well as associated time-frequency analysis of LFP and EEG in a  
1136 VGLUT2-ChR2-EYFP mouse during WK (A), SWS (E) and PS (I). The blue bar  
1137 represents the optogenetic stimulation period (20 Hz with pulses of 10 ms for 10 s). (B,  
1138 C, F, G, J, K) LFP power spectra between 0-18 Hz and 60-100 Hz in VGLUT2-ChR2-  
1139 EYFP mouse before and during light stimulation (20 Hz 10 s, pulses of 10 ms, during 4  
1140 h) during WK (B, C), SWS (F, G) and PS (J, K). An effect was clearly visible on the LFP  
1141 in all vigilance states. The stimulation induced a slight increase in the theta power during  
1142 WK (A, B) and a major increase in theta power and frequency during PS (I, J) as well as  
1143 a clear reduction of slow waves oscillation during SWS (E, F). The stimulation during  
1144 WK and PS also increased the power of gamma (C, K). Light stimulation during WK  
1145 increased locomotor activity reflected by an increase of EMG signal in VGLUT2-ChR2-  
1146 EYFP mice (A, D, blue trace) as compared to control VGLUT2-EYFP mice (D, grey  
1147 trace). (H) Light stimulation during SWS induced awakening reflected by a significant  
1148 increase of the awakening percentage after stimulation in most VGLUT2-ChR2-EYFP  
1149 mice (range 30% to 100%) as compared to that observed in control VGLUT2-EYFP mice  
1150 (range: 0% to 30 %). (L) In contrast no significant difference in the percentage of  
1151 awakening was observed between VGLUT2-CHR2-EYFP and control VGLUT2-EYFP  
1152 mice when stimulation was performed during PS.

1153

1154

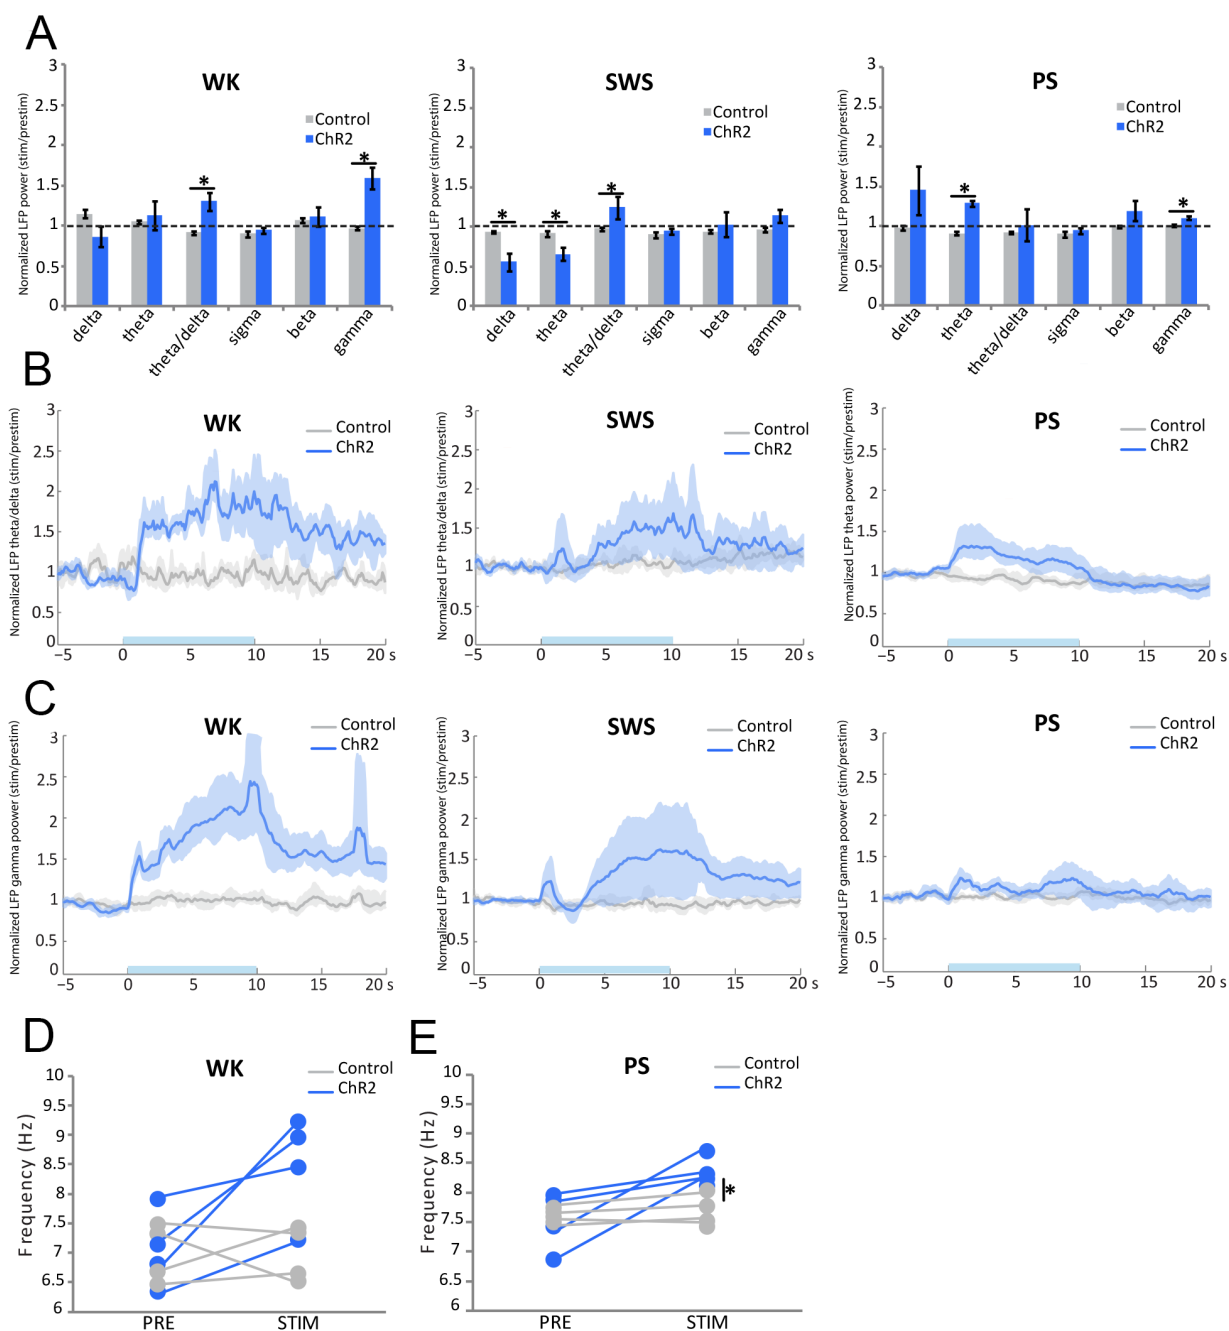

1155  
 1156 **Figure 6: Comparison of the effects of light stimulation of axonal terminals from**  
 1157 **SuML neurons innervating the dorsal DG on DG LFP performed during WK, SWS**  
 1158 **and PS between VGLUT2-ChR2-EYFP and control VGLUT2-ChR2-EYFP mice.**  
 1159 (A) Ratio of power recorded during light stimulation to that recorded before the  
 1160 stimulation (20 Hz, 10 s for 4 h with pulses 10 ms) for the different frequency bands

1161 (delta, theta, gamma) of LFP in VGLUT2-ChR2-EYFP (n= 4) and control VGLUT2-EYFP  
1162 (n= 4) mouse groups during WK, SWS and PS. These ratios illustrate: an increased  
1163 power in the theta frequency band during stimulations performed in PS; an increase of  
1164 theta/delta power during the stimulation when performed in WK and SWS and an  
1165 increased power in the gamma frequency band when stimulations were performed  
1166 during WK and PS in the VGLUT2-ChR2-EYFP group. Increased power observed during  
1167 stimulations observed in the ChR2 group differed significantly from random variation  
1168 observed before and after the stimulation in the control group. Significance: Mann  
1169 Whitney: \*  $p < 0.05$ . (B, C) Theta/delta (B) and gamma (C) power ratios as a function of  
1170 time after light stimulation during the different vigilance states. The blue bar on the x axis  
1171 represents the stimulation period. Shaded regions show 95% confidence  
1172 intervals. During WK, a significant increase of theta/delta (B) and gamma (C) power  
1173 occurred in VGLUT2-ChR2-EYFP group immediately after the light stimulation. These  
1174 increases were observed during the entire 20 s period analyzed. The increase of  
1175 theta/delta during SWS occurred two to three seconds after the stimulation. The  
1176 increase of theta (B) and gamma (C) powers during PS occurred immediately after the  
1177 stimulation and stayed during the 10 s period of stimulation. No difference induced by  
1178 the stimulation was observed in the control group. (D, E) Peak frequency analysis of  
1179 theta before and during optogenetic stimulation in the control group (n= 4) and the ChR2  
1180 group (n= 4). Significance: Mann Whitney, \*  $p < 0.05$  compared to the control group.

1181

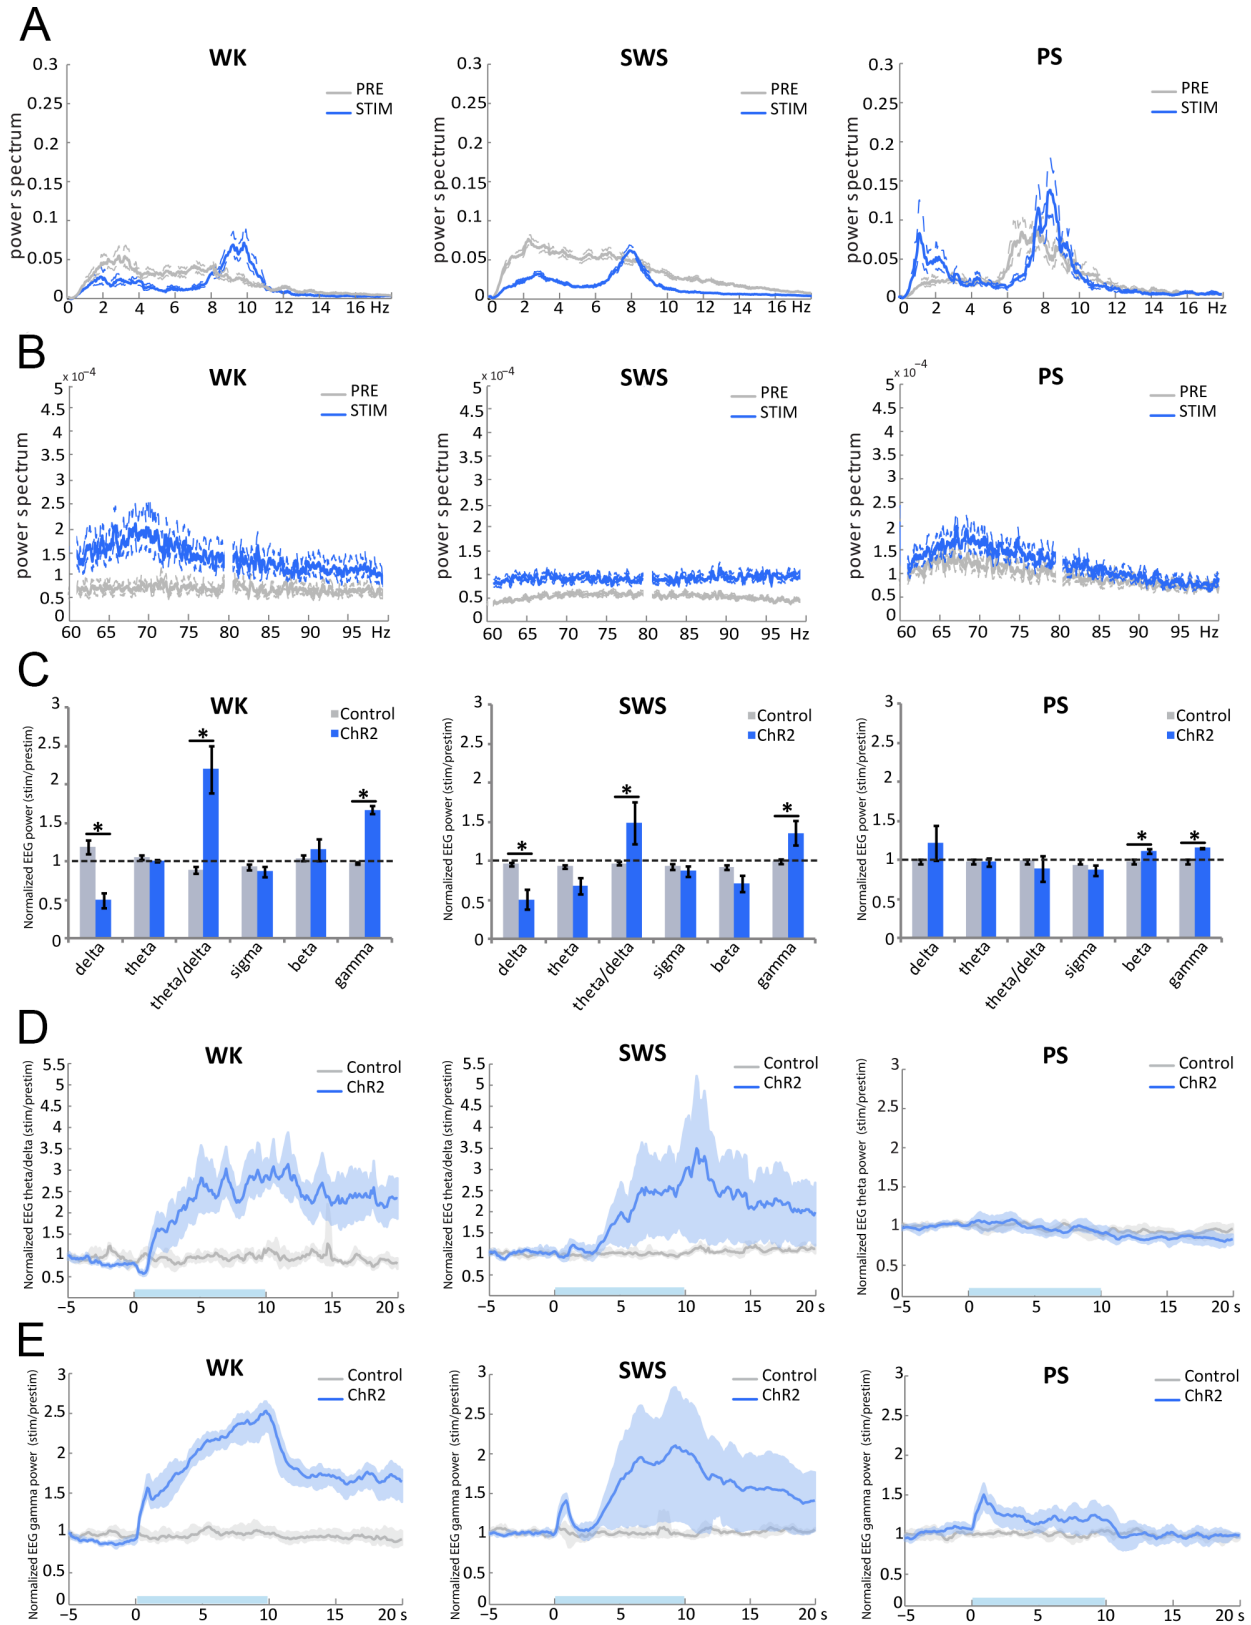

1183 **Figure 7: Comparison of the effects of light stimulation of axonal terminals from**  
1184 **SuML neurons innervating the dorsal DG on EEG performed during WK, SWS and**  
1185 **PS between VGLUT2-ChR2-EYFP and control VGLUT2-EYFP mice.**

1186 (A, B) EEG power spectra between 0-18 Hz and 60-100 Hz in a VGLUT2-ChR2-EYFP  
1187 mouse before and during light stimulation (20 Hz 10 s, pulses of 10 ms, during 4 h)  
1188 during WK, SWS and PS. An effect was clearly visible on the EEG in all vigilance states.  
1189 (C) Ratio of power recorded during light stimulation to that recorded before the  
1190 stimulation for the different frequency bands (delta, theta, gamma) of EEG in VGLUT2-  
1191 ChR2-EYFP (n= 4) and control VGLUT2-EYFP (n= 4). These ratios illustrate an increase  
1192 of theta/delta power during the stimulation when performed in WK and SWS and an  
1193 increased power in the gamma frequency band when stimulations were performed  
1194 during all vigilance states in the VGLUT2-ChR2-EYFP group. These increased powers  
1195 during stimulations observed in ChR2 group differed significantly from random variation  
1196 observed before and after the stimulation in the control group. Significance: Mann  
1197 Whitney: \*  $p < 0.05$ . (D, E) Theta/delta (D) and gamma (E) power ratios as a function of  
1198 time after light stimulation during the different vigilance states. The blue bar on the x axis  
1199 represents the stimulation period. Shaded regions show 95% confidence intervals.  
1200 During WK, a significant increase of theta/delta (B) and gamma (C) powers occurred in  
1201 VGLUT2-ChR2-EYFP group immediately after the light stimulation. These increases  
1202 were observed during the entire 20 s period analyzed. The increase of theta/delta during  
1203 SWS occurred two to three seconds after the stimulation. The increase of gamma (C)  
1204 powers during PS occurred immediately after the stimulation and lasted during the 10 s  
1205 period of stimulation. No increase in theta was observed during PS (C, D) in the EEG.  
1206 No difference induced by the stimulation was observed in the control group.

1207

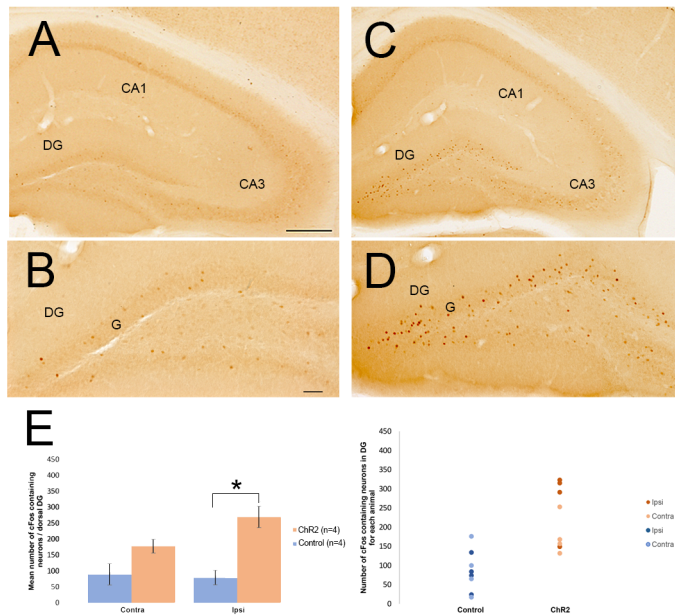

**Figure 8: Activation of DG cells after light stimulation of axon terminals from SuML neurons innervating the DG in VGLUT2-ChR2-EYFP and VGLUT2-EYFP as reflected by cFos immunohistochemical labeling.**

(A, B, C, D) Immunohistochemical labeling for cFos on sections of control

1217 VGLUT-EYFP (A, B,) and VGLUT2-ChR2-EYFP (C, D) mice. In control mice (A, B) only  
1218 very few neurons labeled for cFos were observed in the hippocampus. There were  
1219 scattered in all layers of the hippocampus including CA1, CA3 and the DG. In addition,  
1220 these neurons were lightly labeled for cFos including in the granule cell layer (G) of the  
1221 DG. In contrast, in VGLUT2-ChR2-EYFP mice, many c-Fos containing neurons were  
1222 located in the granule cells layer (G) of the DG whereas only a few were observed within  
1223 the CA3 and CA1 regions of the hippocampus. In the granule cell layer these neurons  
1224 were highly labeled for cFos (D) as compared to those observed in control mice (B). (E)  
1225 Quantitative analysis confirmed a clear increase number of cFos-containing neurons in  
1226 the granule cell layer of the DG stimulated (ipsi) but not in the contralateral DG (contra)  
1227 in VGLUT2-ChR2-EYFP mice (n= 4) as compared to control mice (n= 4). Wilcoxon  
1228 Rank Sum test \*  $P < 0.05\%$ ; Scale Bars: A, C: 250  $\mu\text{m}$ ; B, D: 50  $\mu\text{m}$ .

1229
